# Supplementary material
Source: Research Square preprint supplement (doi:10.21203/rs.3.rs-9719390/v1)
Supplement: Supplementary file 1 [file 4dfcba8e31099e1256e7a215.docx]

**Supplementary Tables**

Table S1: Thermal stress category for the wet bulb globe temperature

| **Category** | **WBGT range (°C)** |
| --- | --- |
| Low heat-related thermal stress | WBGT < 23 |
| Moderate heat-related thermal stress | 23 ≤ WBGT < 28 |
| Strong heat-related thermal stress | 28 ≤ WBGT < 31 |
| Very strong heat-related thermal stress | WBGT ≥ 31 |

Source: (Brimicombe et al., 2023)

Table S2: Thermal stress category for the universal thermal climatic index

| **UTCI (°C)** | **Thermal Stress Category** |
| --- | --- |
| **> +46** | Extreme heat-related thermal stress |
| **+38 to +46** | Very strong heat-related thermal stress |
| **+32 to +38** | Strong heat-related thermal stress |
| **+26 to +32** | Moderate heat-related thermal stress |
| **+9 to +26** | No heat-related thermal stress |
| **0 to +9** | Slight cold thermal stress |
| **−13 to 0** | Moderate cold thermal stress |
| **−27 to −13** | Strong cold thermal stress |
| **−40 to −27** | Very strong cold thermal stress |
| **< −40** | Extreme cold thermal stress |

Source: (Jendritzky et al., 2012)

Table S3: Trend of days under different stress category across the district of Uttar Pradesh during 1975-2024.

|  | **WBGT** | | **UTCI** | |
| --- | --- | --- | --- | --- |
| **District** | **Low heat-related thermal stress(n)** | **Very strong heat-related thermal stress (n)** | **No thermal stress (n)** | **Strong heat-related thermal stress(n)** |
| Agra | -5.9 | 5.0 | -3.9 | 5.0 |
| Aligarh | -6.1 | 5.0 | -2.2 | 3.3 |
| Allahabad | -4.1 | 6.3 | -3.6 | 5.4 |
| Ambedkar Nagar | -4.7 | 4.4 | -2.7 | 4.2 |
| Amethi | -4.6 | 5.0 | -3 | 4.4 |
| Auraiya | -5 | 5.0 | -3.8 | 4.8 |
| Azamgarh | -4.5 | 4.2 | -3 | 4.1 |
| Baghpat | -5.5 | 4.7 | **-1.3** | **1.9** |
| Bahraich | -5.2 | 4.7 | -1.7 | 2.8 |
| Ballia | -4.8 | 3.9 | -3.2 | 4.7 |
| Balrampur | -5.4 | 5.0 | **-1.3** | **0.9** |
| Banda | -4.3 | 5.3 | -5 | 6.3 |
| Bara Banki | -4.6 | 4.4 | -2.5 | 3.5 |
| Bareilly | -5.3 | 4.6 | -2.7 | **2.3** |
| Basti | -4.4 | 4.1 | -2 | 3.7 |
| Bijnor | -4.1 | 5.0 | -2.4 | 3.3 |
| Budaun | -5.8 | 4.7 | -2.1 | **2.5** |
| Bulandshahr | -5.6 | 4.7 | **-1.9** | 2.7 |
| Chandauli | -4.5 | 5.9 | -2.4 | 4.1 |
| Chitrakoot | -4.7 | 6.8 | -4 | 5.4 |
| Deoria | -4.5 | 3.8 | -2 | 3.5 |
| Etah | -5.5 | 4.8 | -3.3 | 4.1 |
| Etawah | -4.9 | 5.1 | -4.3 | 5.0 |
| Faizabad | -4.4 | 4.6 | -2.5 | 4.2 |
| Farrukhabad | -5 | 4.7 | -2.9 | 3.3 |
| Fatehpur | -4.6 | 5.0 | -3.9 | 5.5 |
| Firozabad | -5.6 | 5.0 | -3.1 | 4.5 |
| Gautam Buddha Nagar | -5.5 | 5.2 | -2.2 | 2.8 |
| Ghaziabad | -5.8 | 4.9 | **-1.4** | **2.4** |
| Ghazipur | -4.3 | 4.1 | -3 | 5.0 |
| Gonda | -4.7 | 4.7 | -2 | **2.9** |
| Gorakhpur | -4.3 | 4.0 | -2.1 | 2.9 |
| Hamirpur | -5 | 5.4 | -4.9 | 5.9 |
| Hapur | -5.8 | 4.8 | **-1.8** | **1.8** |
| Hardoi | -5 | 4.6 | -2.8 | 3.3 |
| Jalaun | -5 | 5.2 | -4.3 | 5.2 |
| Jaunpur | -4.6 | 5.0 | -3.1 | 5.7 |
| Jhansi | -5.3 | 7.0 | -4.5 | 4.0 |
| Jyotiba Phule Nagar | -5.3 | 5.0 | -1.7 | **1.9** |
| Kannauj | -5.3 | 4.8 | -3.3 | 3.8 |
| Kanpur Dehat | -4.8 | 5.0 | -3.7 | 4.7 |
| Kanpur Nagar | -4.5 | 5.1 | -4 | 4.9 |
| Kanshiram Nagar | -5.4 | 4.6 | -2.6 | 3.0 |
| Kaushambi | -4 | 5.9 | -4.1 | 6.3 |
| Kheri | -5 | 4.4 | -2 | 2.7 |
| Kushinagar | -4.7 | 4.1 | **-1.9** | **2.9** |
| Lalitpur | -5 | 6.1 | -3.9 | **1.4** |
| Lucknow | -4.8 | 4.6 | -2.8 | 3.3 |
| Mahamaya Nagar | -6.1 | 4.9 | -2.7 | 4.1 |
| Maharajganj | -4.7 | 5.3 | **-1.9** | **2.2** |
| Mahoba | -4.8 | 6.8 | -4.7 | 5.0 |
| Mainpuri | -5.6 | 5.0 | -3.3 | 4.2 |
| Mathura | -6 | 5.0 | -3.1 | 4.3 |
| Mau | -4.5 | 3.9 | -2.5 | 3.6 |
| Meerut | -5.2 | 4.8 | **-1.4** | **1.8** |
| Mirzapur | -4.6 | 6.7 | -3.1 | 4.8 |
| Moradabad | -5.2 | 4.2 | -2.2 | 2.8 |
| Muzaffarnagar | -4.7 | 4.8 | **-1.7** | 2.8 |
| Pilibhit | -5.2 | 4.4 | -2.4 | **2.4** |
| Pratapgarh | -4.3 | 5.6 | -3.8 | 6.3 |
| Rae Bareli | -4.8 | 5.0 | -3.3 | 4.6 |
| Rampur | -5 | 4.7 | -2.4 | **2.2** |
| Saharanpur | -2.9 | 4.7 | **-1.7** | 4.0 |
| Sambhal | -5.5 | 4.8 | **-1.7** | **1.8** |
| Sant Kabir Nagar | -4.3 | 4.1 | -2.5 | 3.5 |
| Sant Ravidas Nagar | -4.2 | 5.6 | -3.2 | 4.7 |
| Shahjahanpur | -5.3 | 4.5 | -2.2 | **2.1** |
| Shamli | -4.7 | 4.4 | **-1.4** | **1.9** |
| Shrawasti | -5 | 4.8 | -1.9 | **2.1** |
| Siddharthnagar | -5 | 5.2 | **-1.9** | **2.1** |
| Sitapur | -5 | 4.2 | -2.3 | **2.6** |
| Sonbhadra | -4.4 | 8.7 | -3.2 | 4.6 |
| Sultanpur | -4.8 | 4.8 | -3 | 4.7 |
| Unnao | -4.5 | 5.0 | -3 | 4.0 |
| Varanasi | -4.1 | 5.1 | -3.2 | 5.0 |

*Note: n means days/decade and symbol represent increasing or decreasing trend at 0.05 significance level; Insignificant result are represented in bold figures.*
