# Supplementary material
Source: Research Square preprint supplement (doi:10.21203/rs.3.rs-9719390/v1)
Supplement: Supplementary file 2 [file 82c0412f3debdf0064e8461b.docx]

**Supplementary Figures**

| Wet Bulb Globe Temperature (WBGT) | Universal Thermal Climatic Index (UTCI) |
| --- | --- |
| 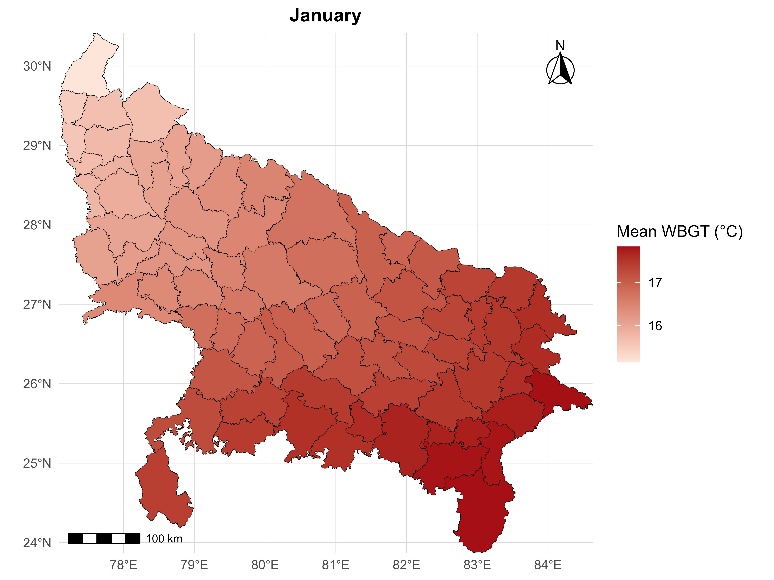 | 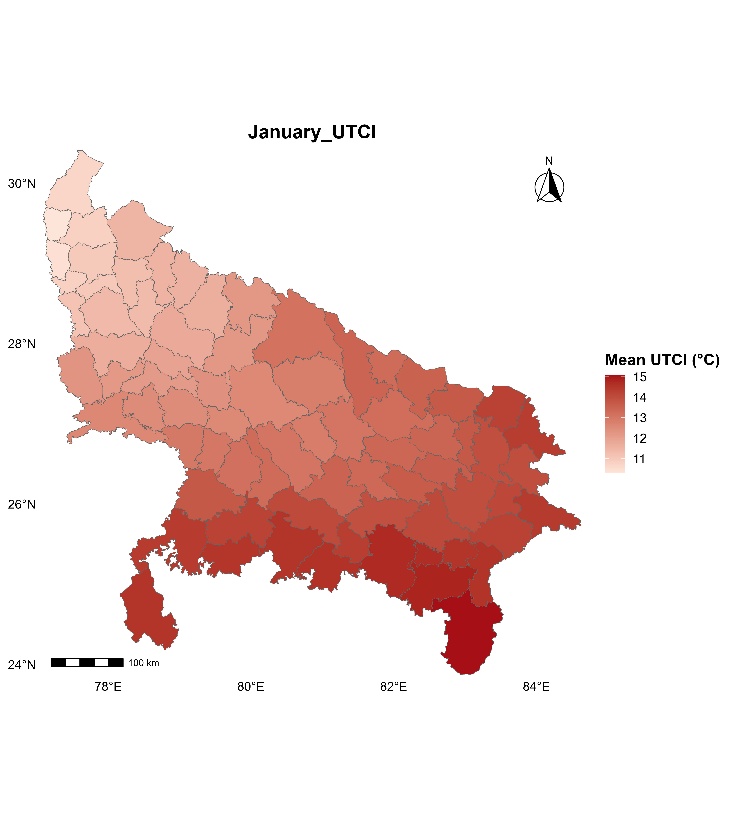 |
| a | b |
| 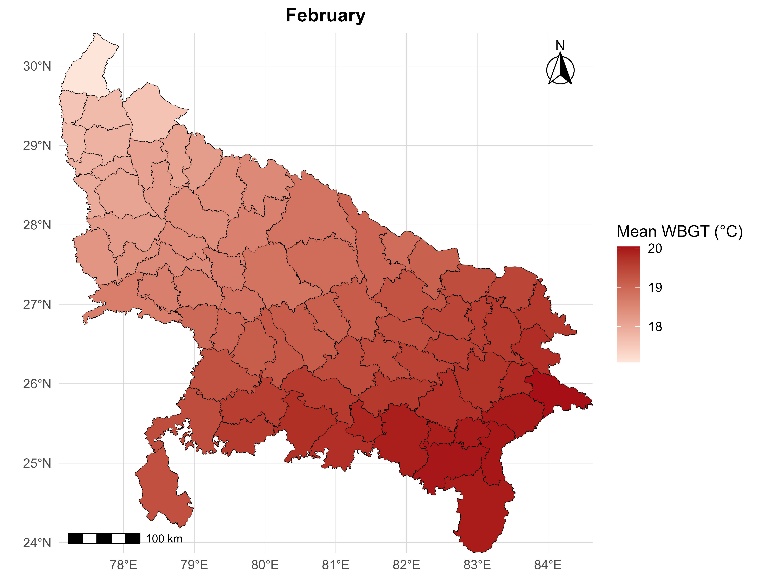 | 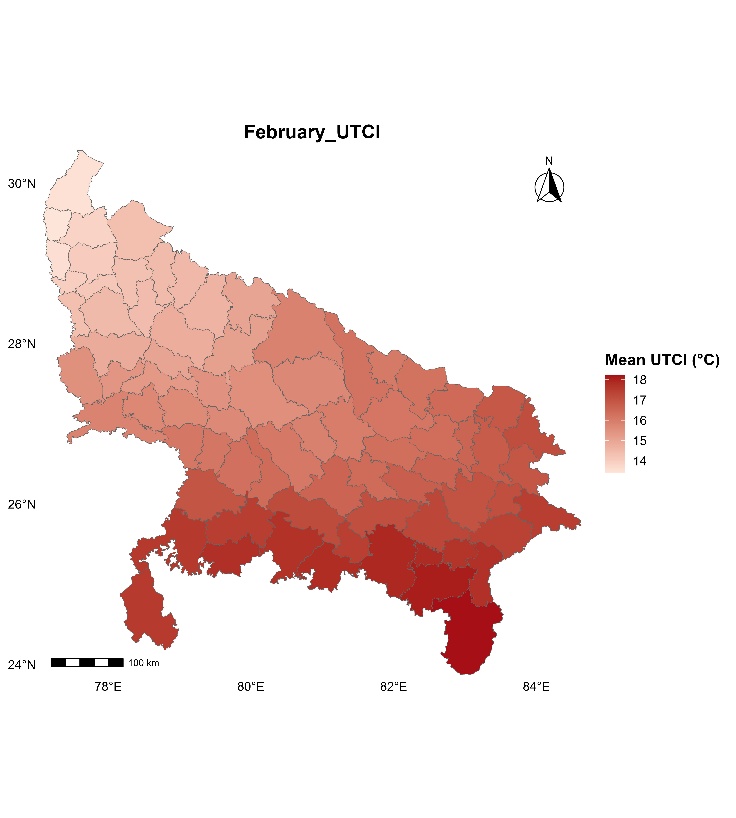 |
| c | d |
| 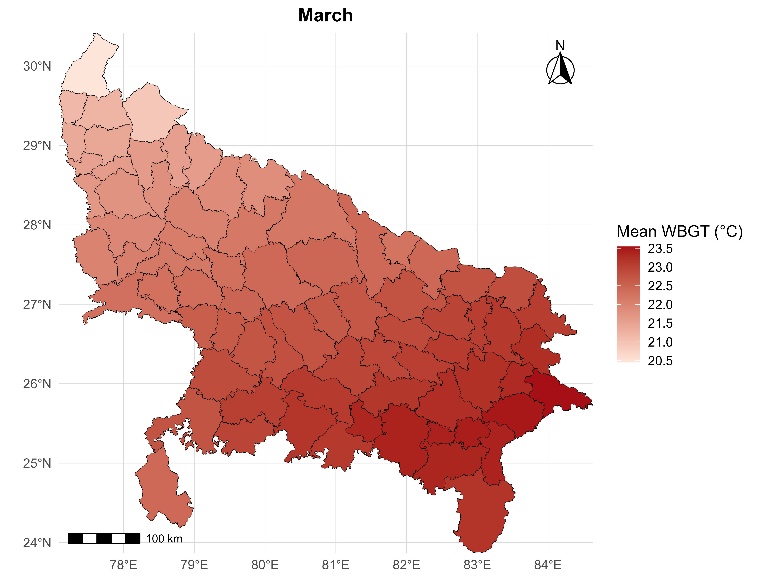 | 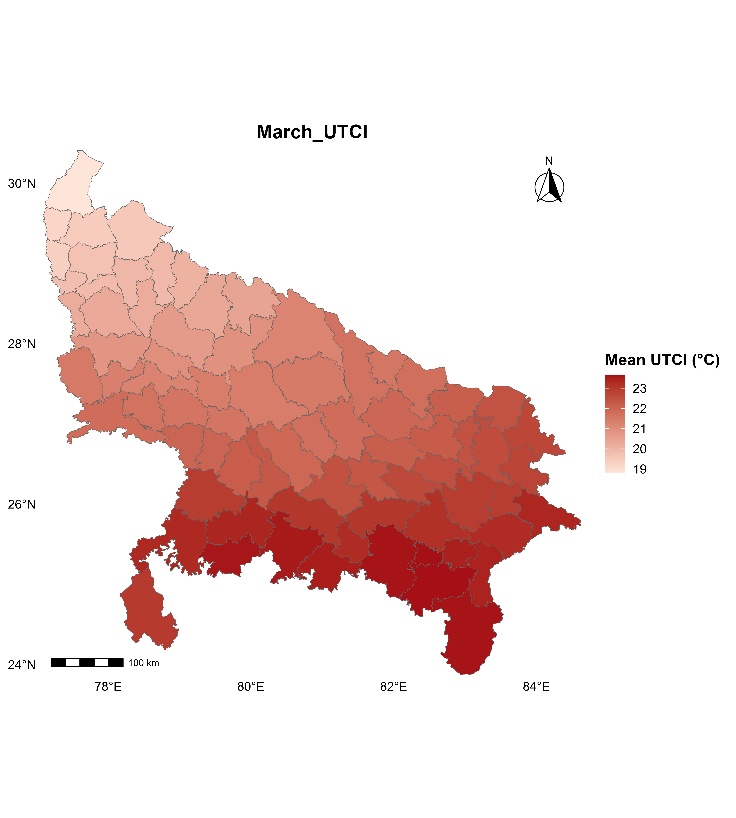 |
| e | f |
| 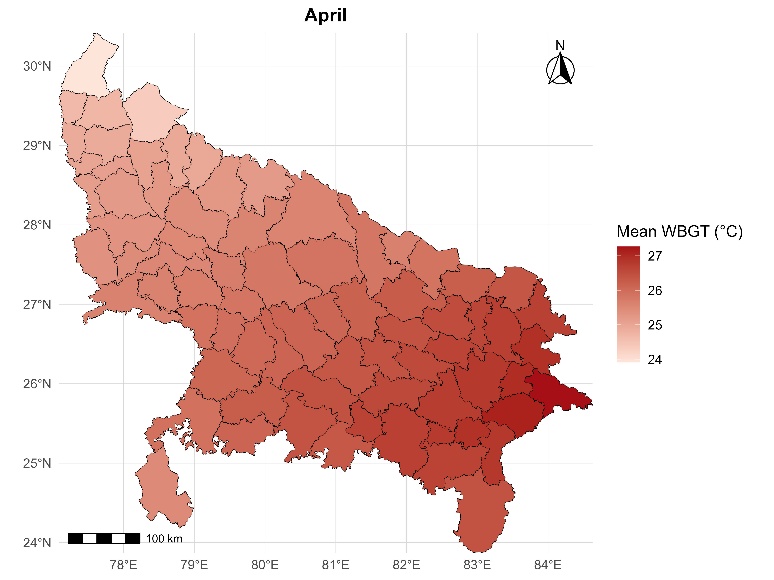 | 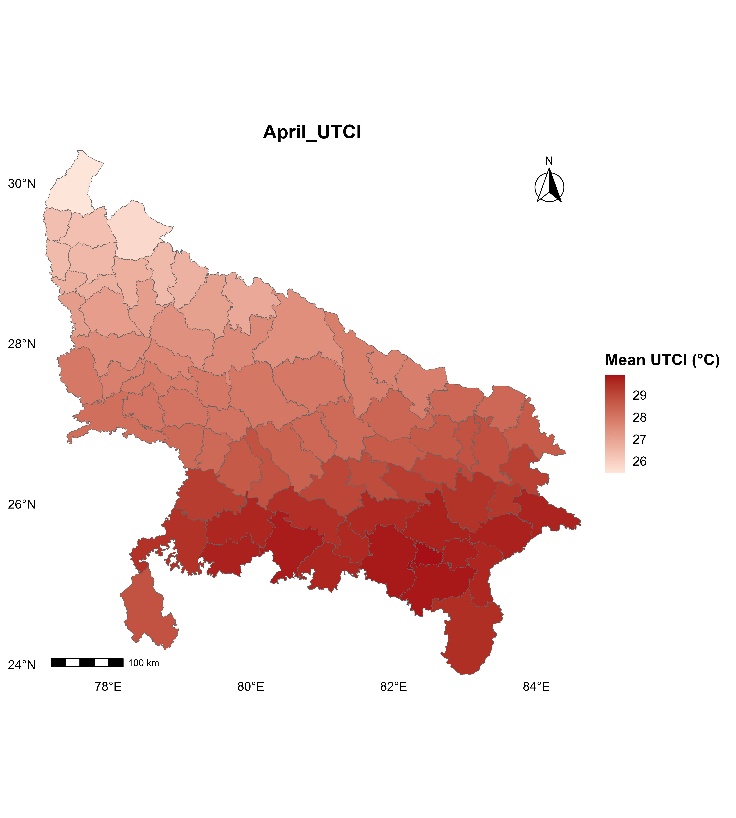 |
| g | h |
| 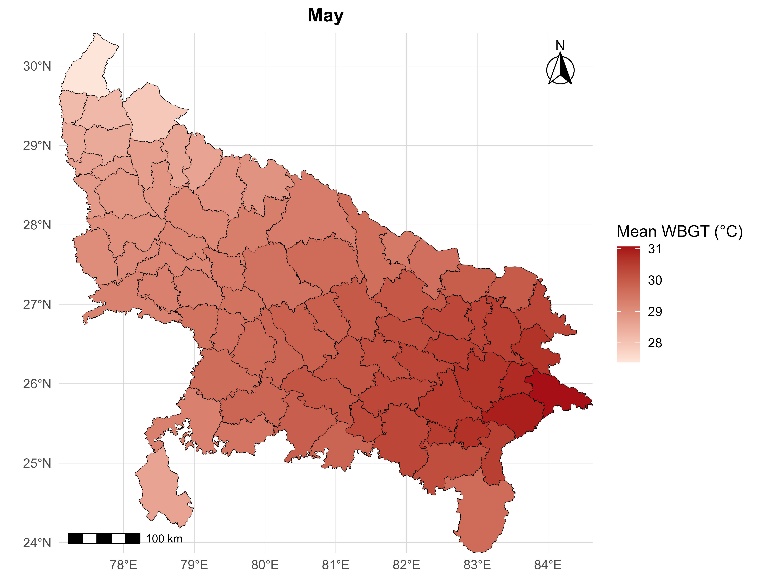 | 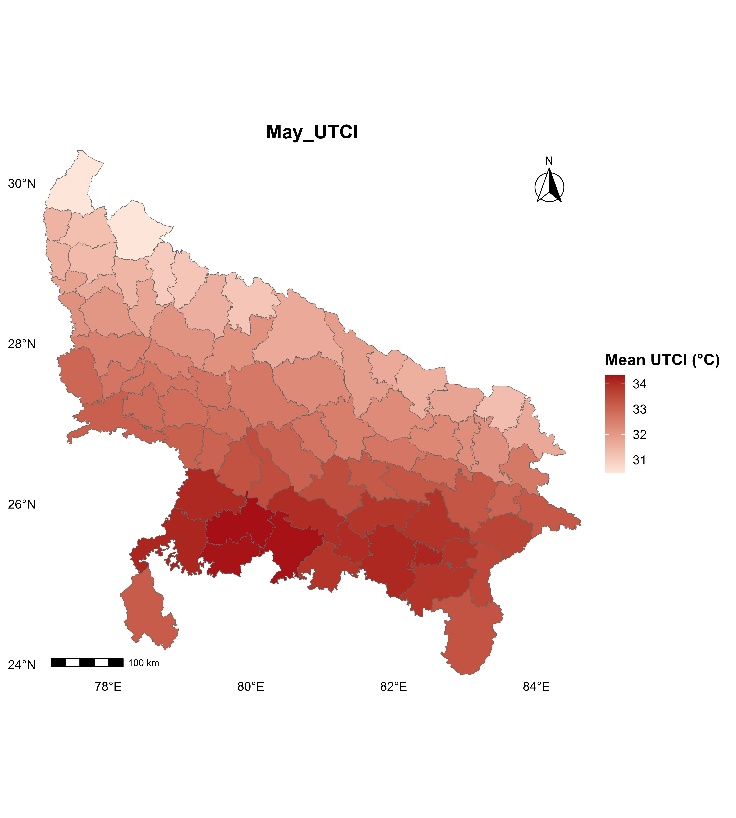 |
| i | j |
| 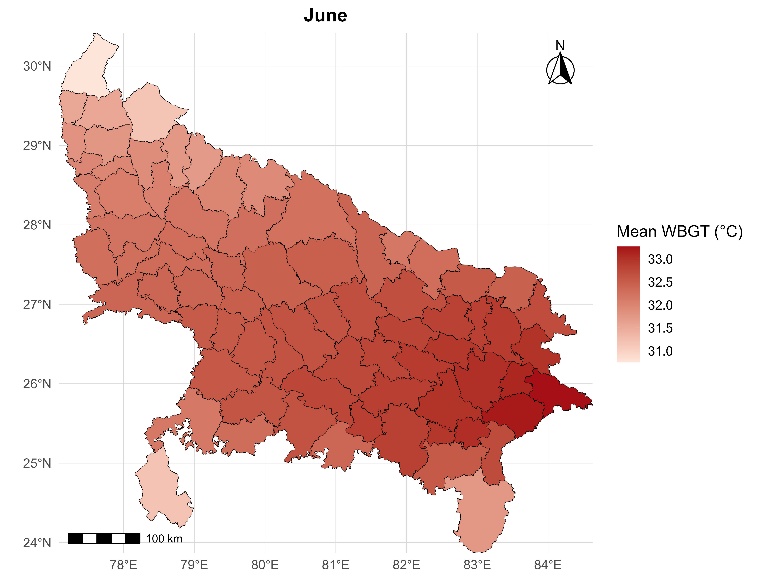 | 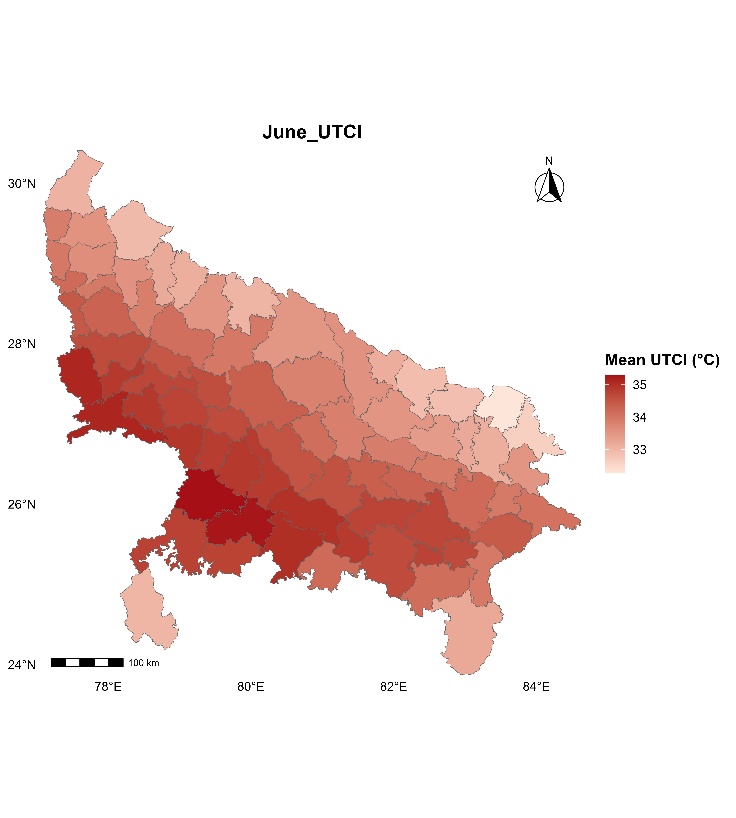 |
| k | l |
| 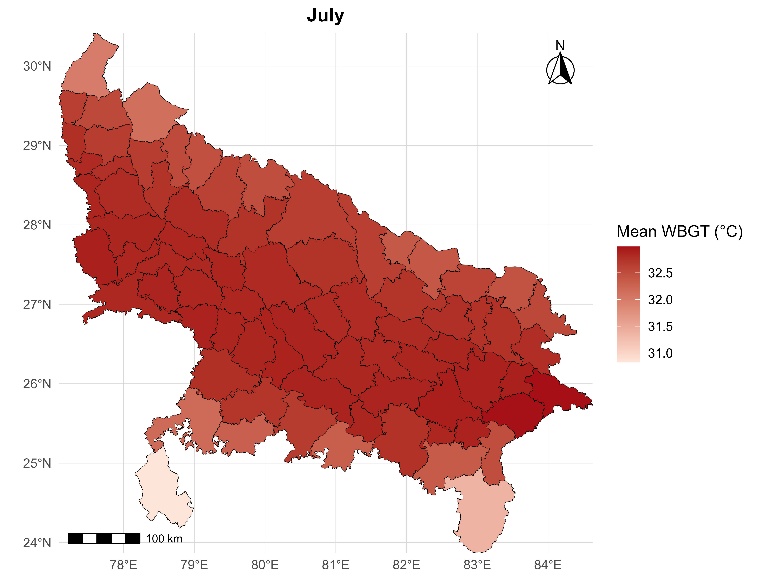 | 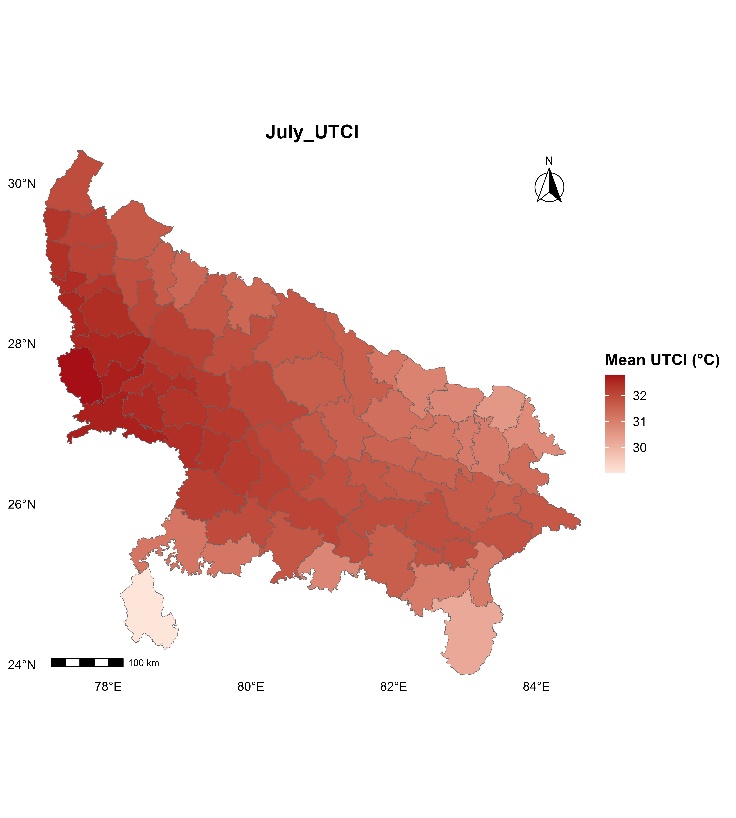 |
| m | n |
| 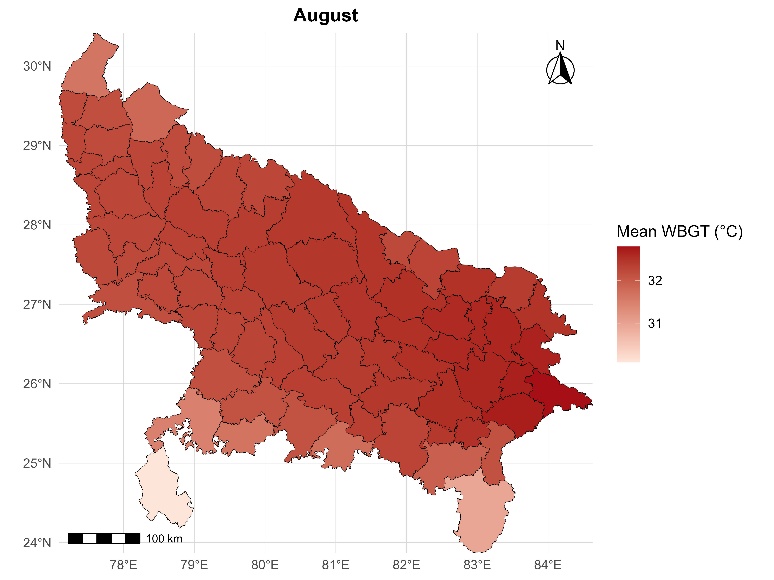 | 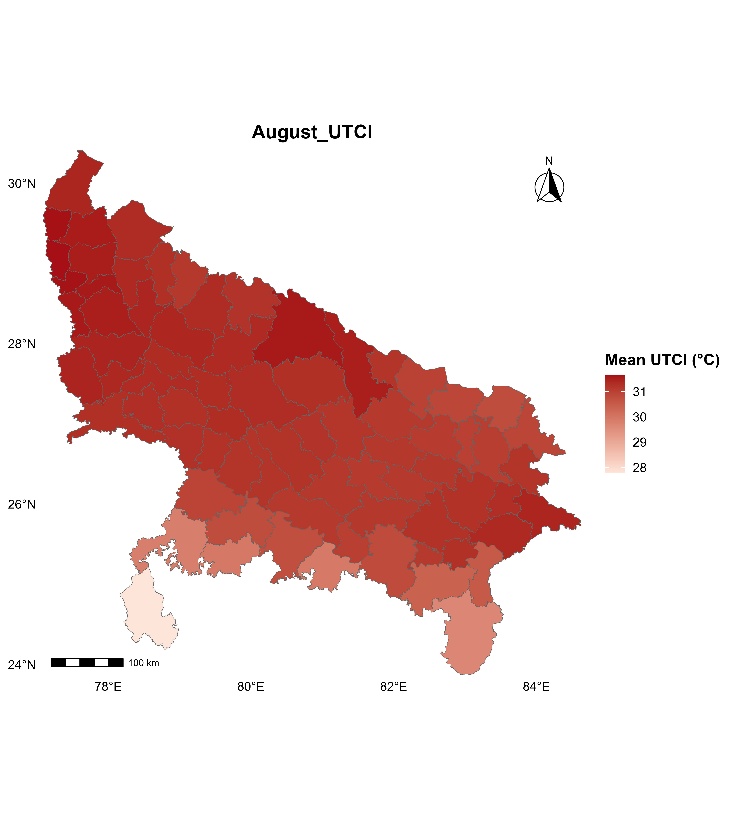 |
| o | p |
| 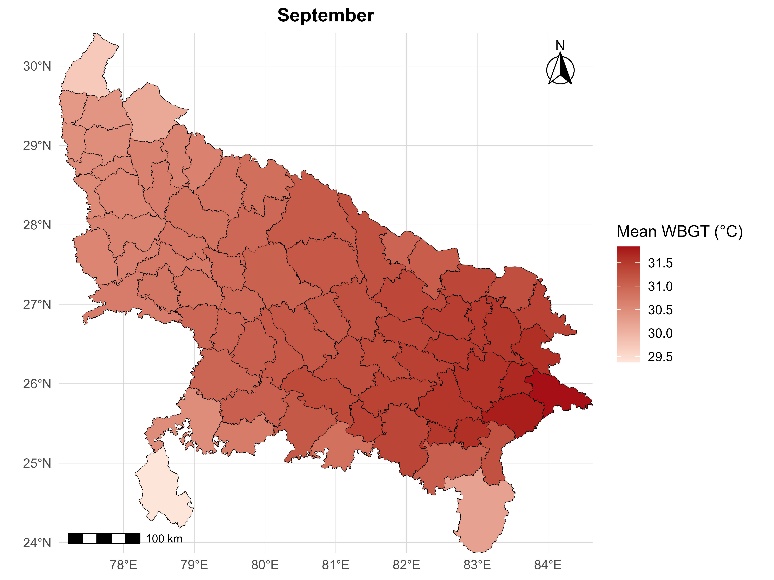 | 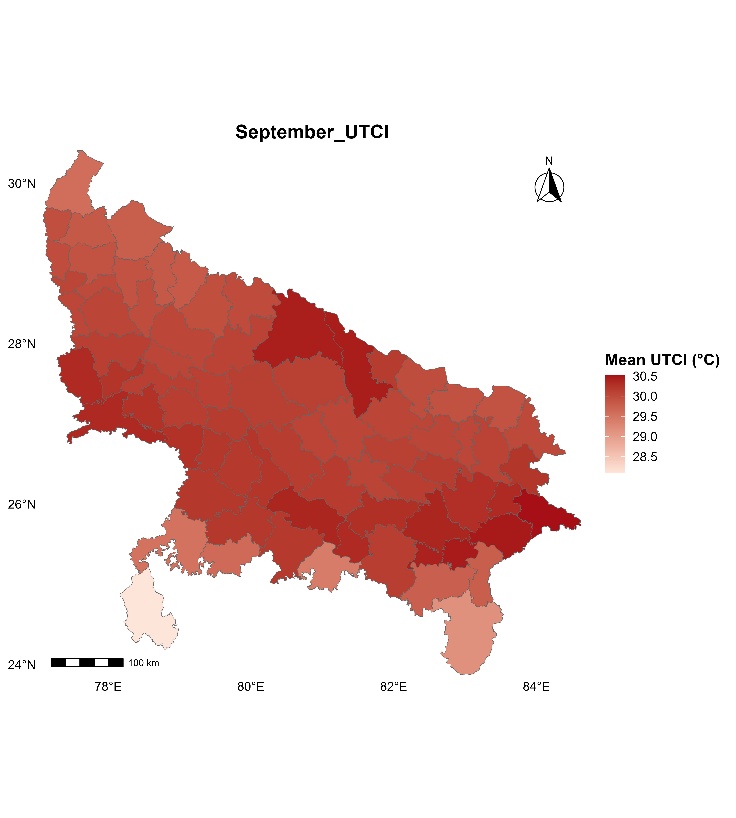 |
| q | r |
| 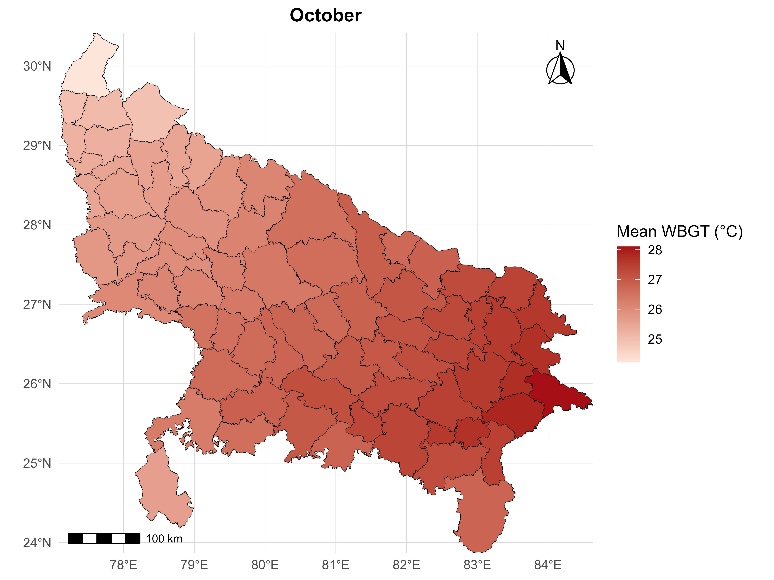 | 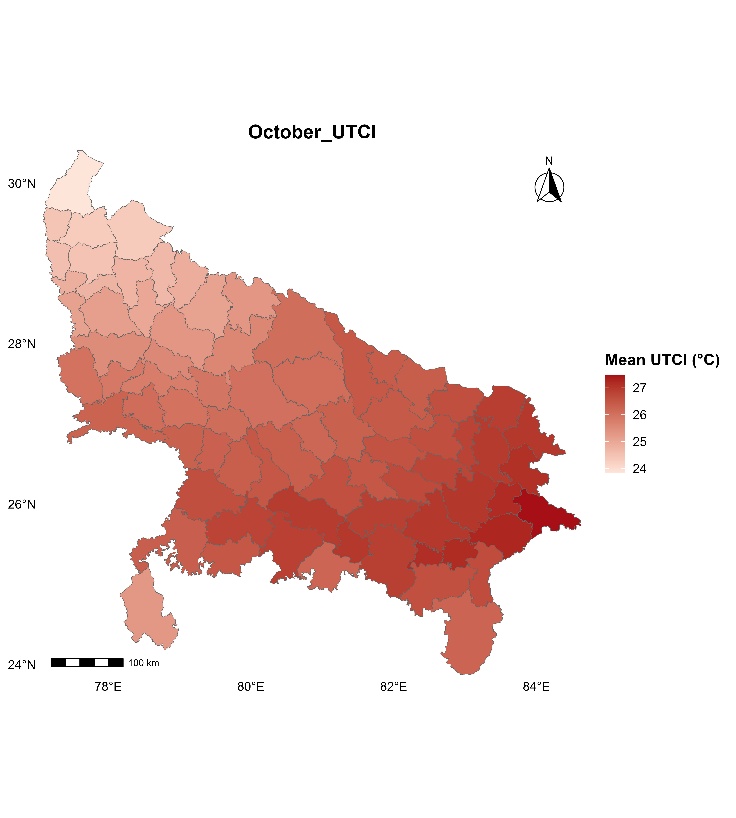 |
| s | t |
| 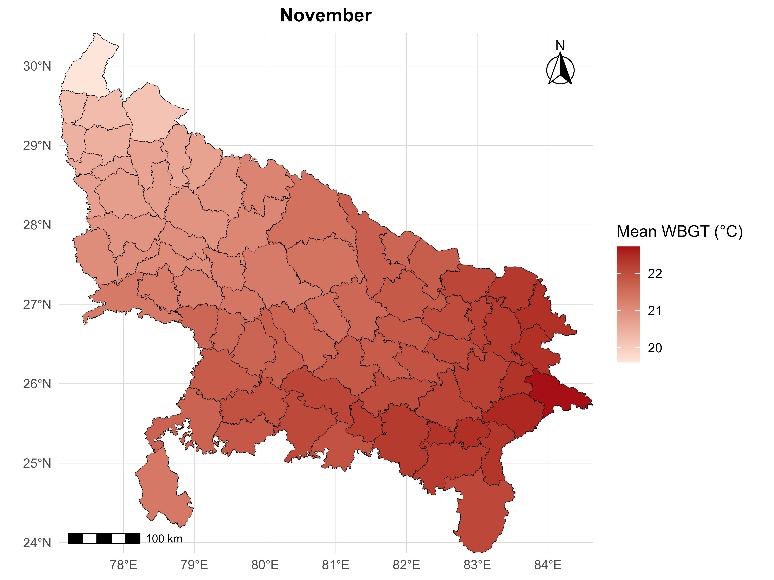 | 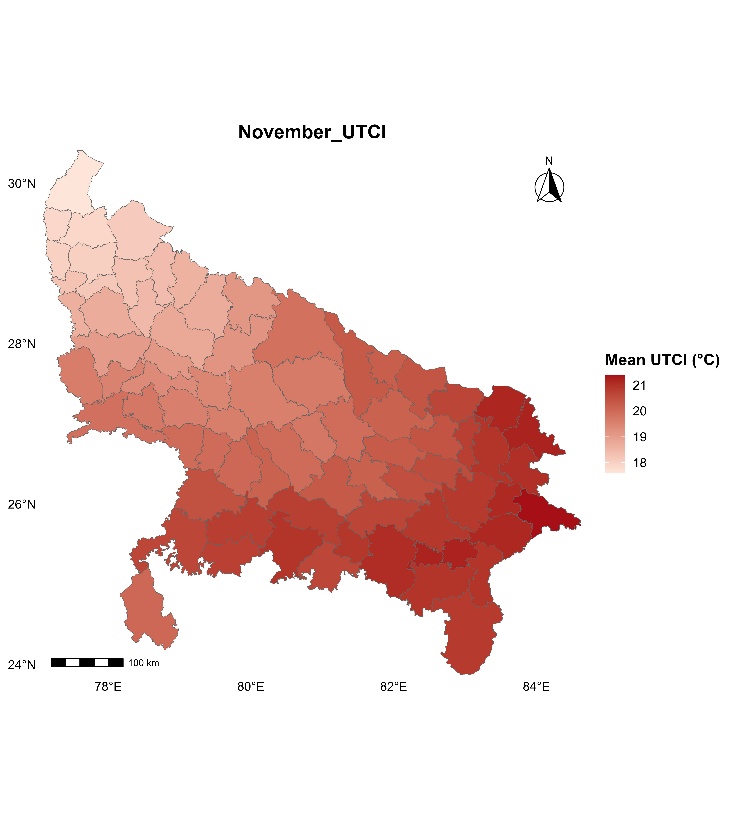 |
| u | v |
| 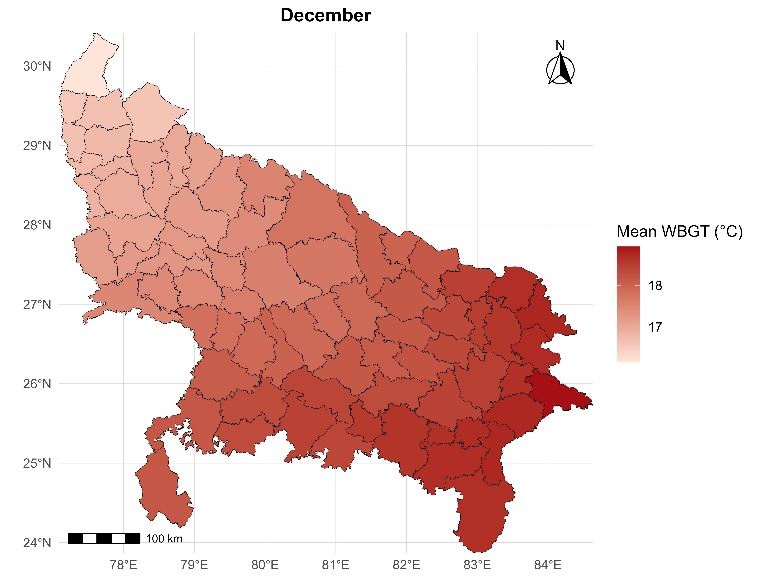 | 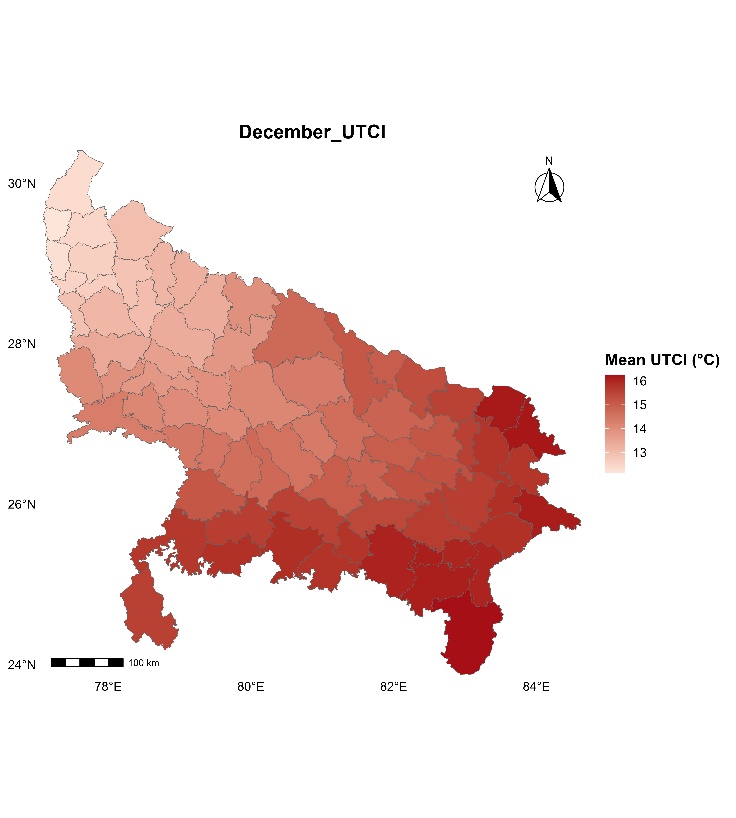 |
| w | x |

Figure S1: Geographical variation of monthly WBGT and UTCI across the districts of Uttar Pradesh during 1975-2024

| Wet Bulb Globe Temperature (WBGT) | Universal Thermal Climatic Index (UTCI) |
| --- | --- |
| 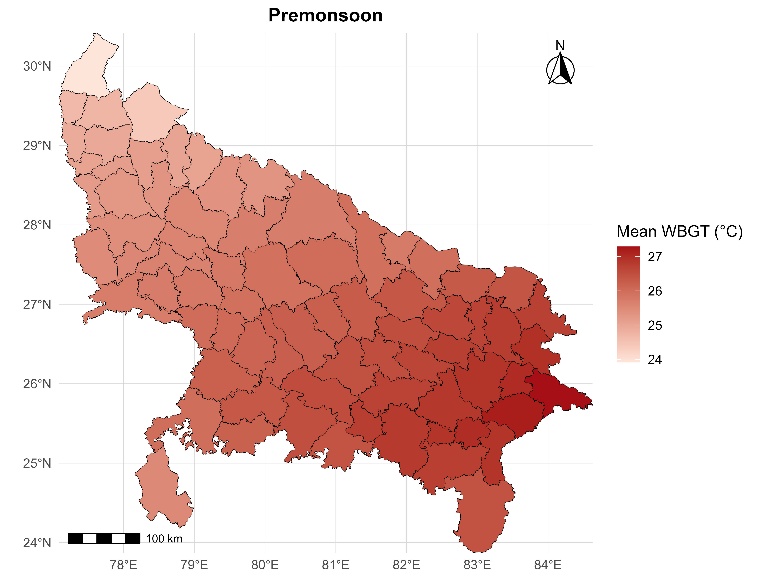 | 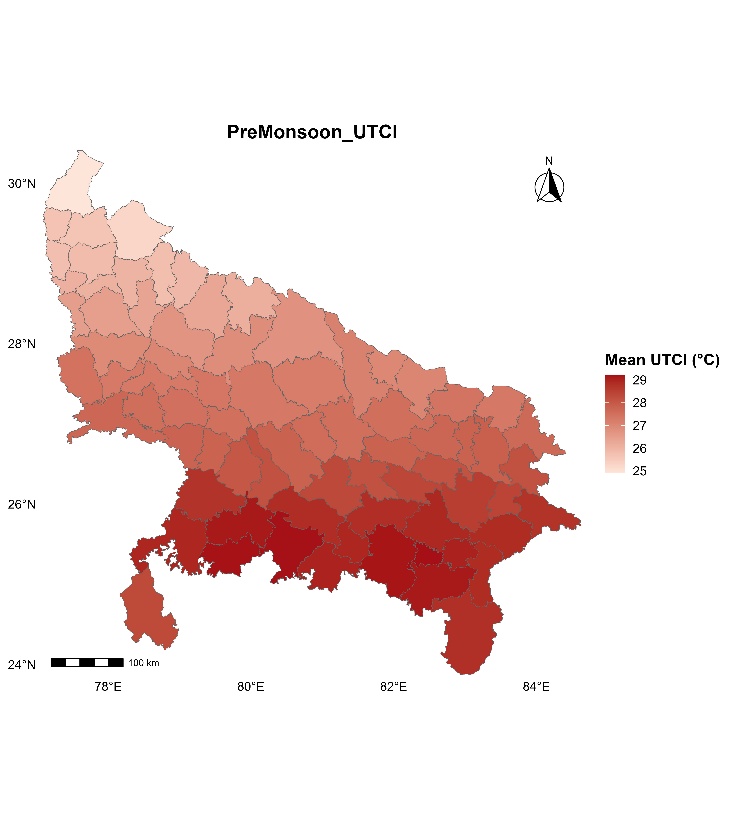 |
| a | b |
| 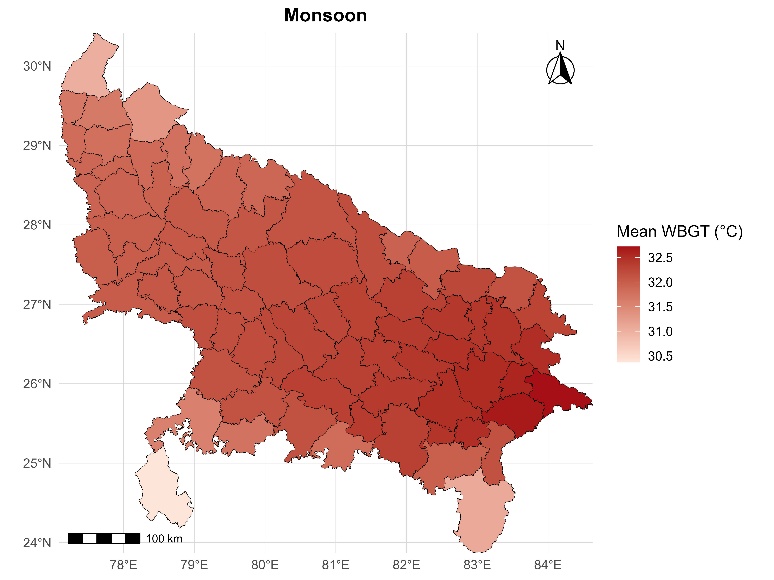 | 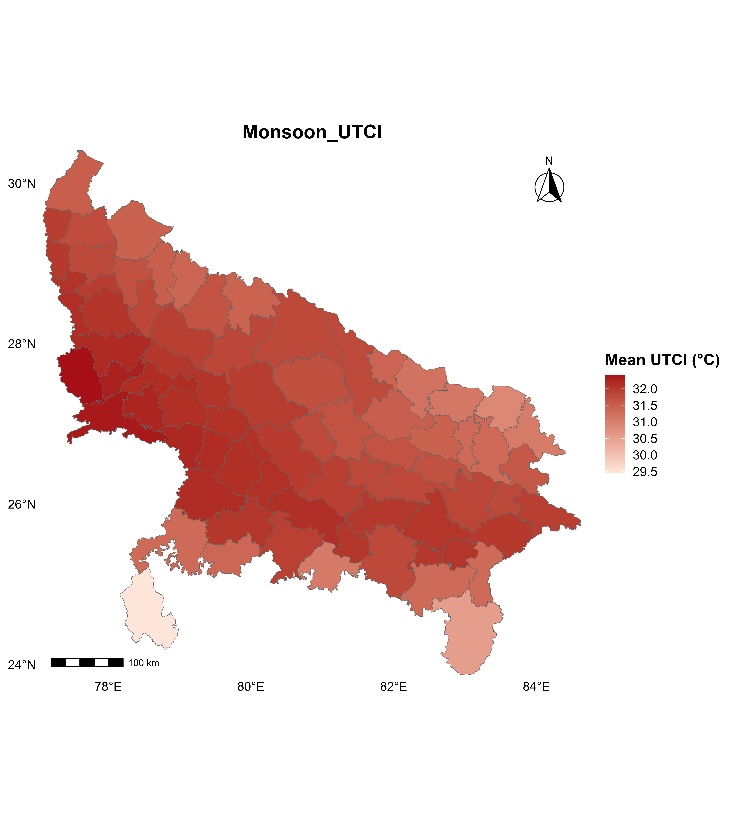 |
| c | d |
| 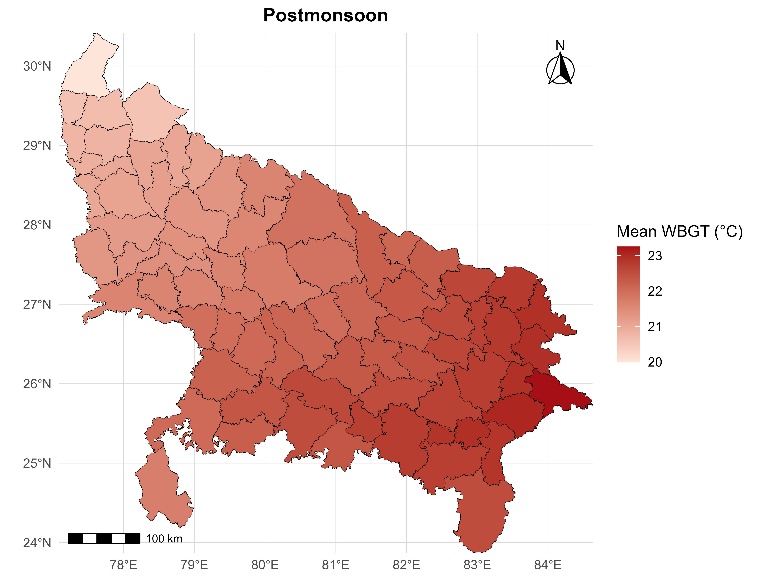 | 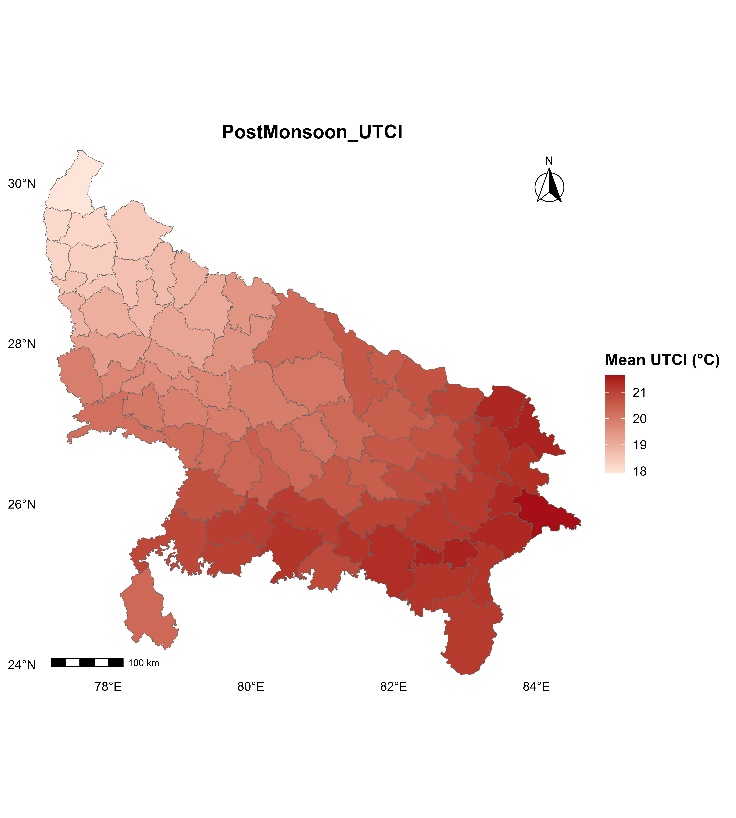 |
| e | f |
| 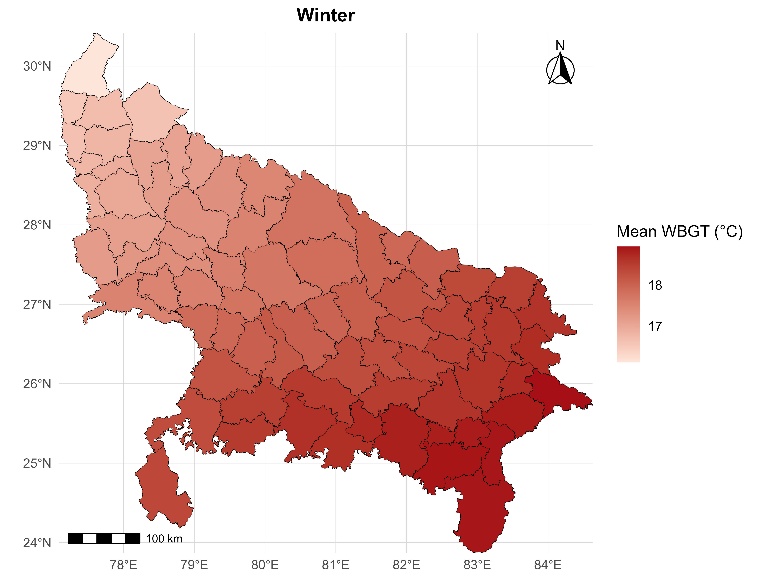 | 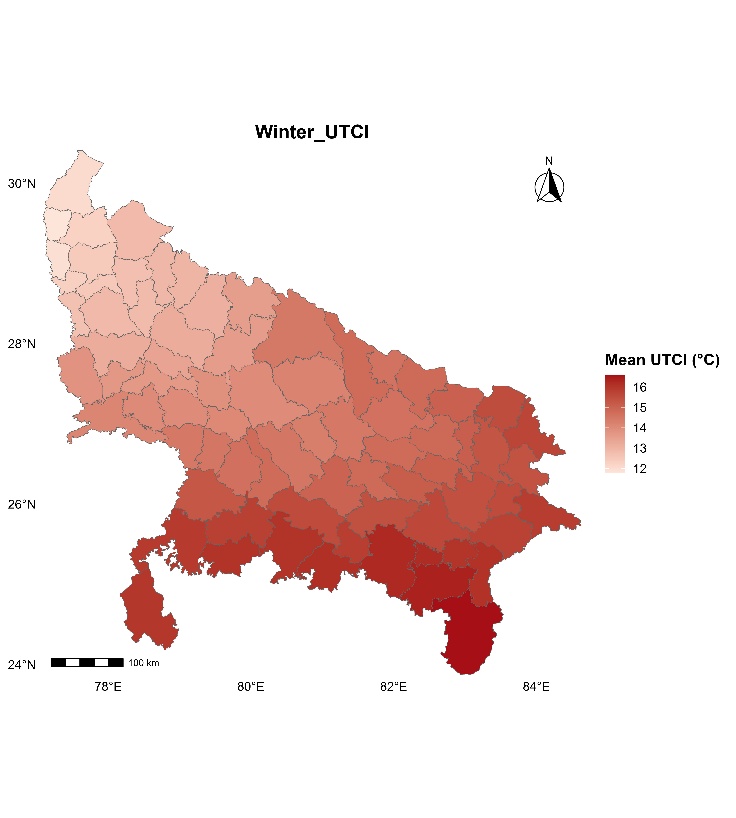 |
| g | h |

Figure S2: Geographical variation of seasonal WBGT and UTCI across the districts of Uttar Pradesh during 1975-2024

| Wet Bulb Globe Temperature (WBGT) | Universal Thermal Climatic Index (UTCI) |
| --- | --- |
| 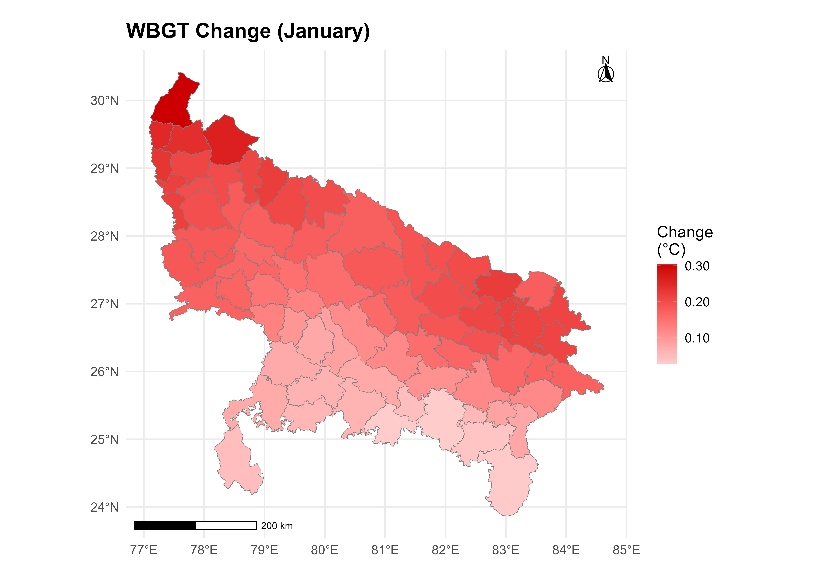 | 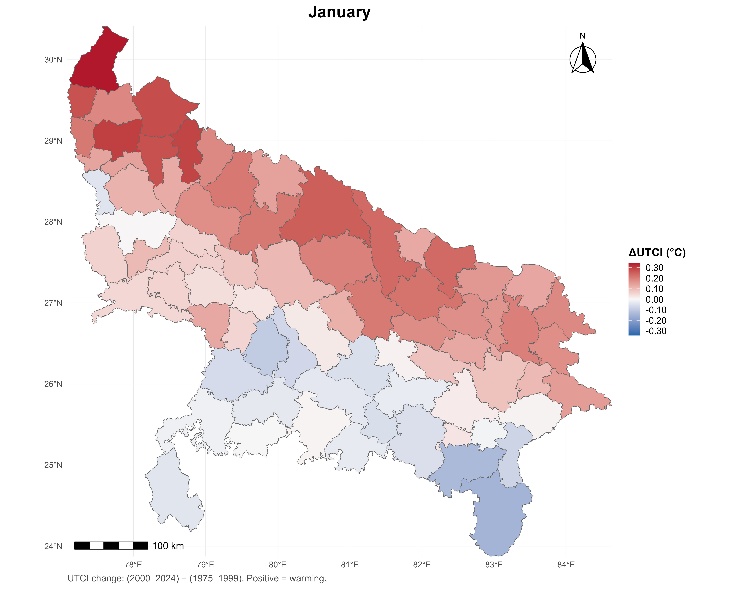 |
| a | b |
| 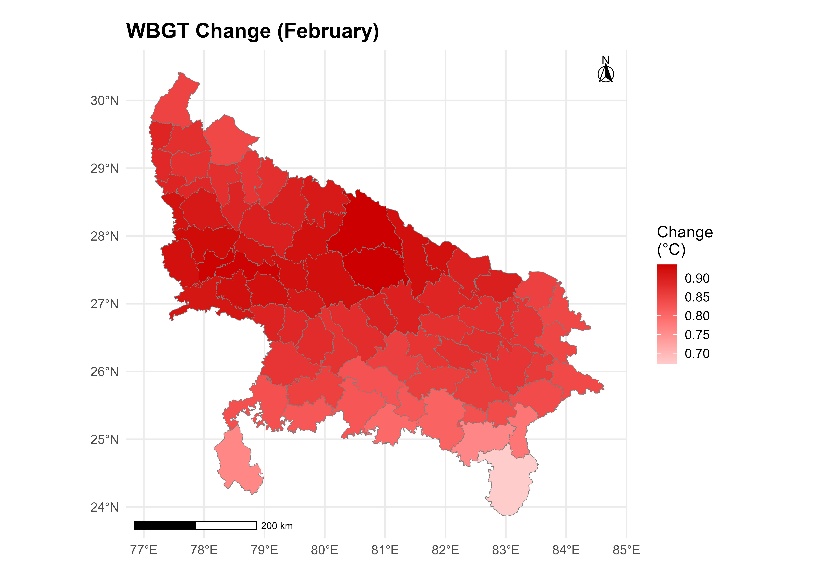 | 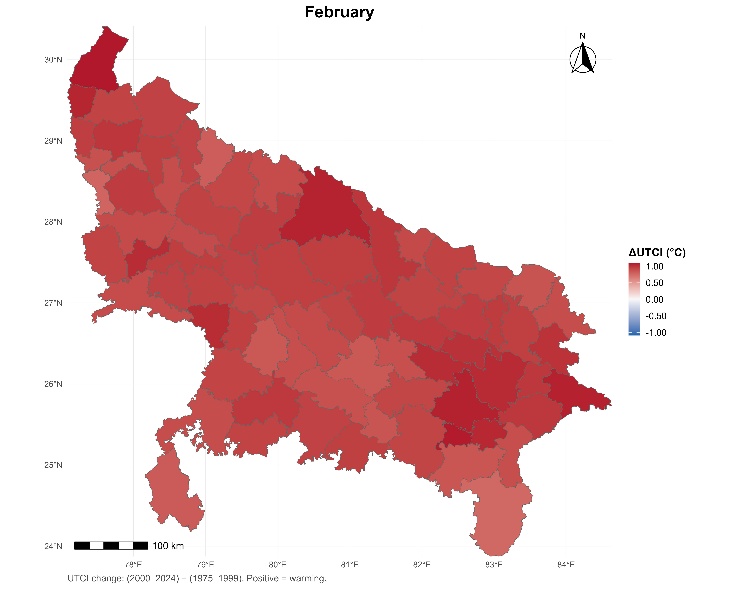 |
| c | d |
| 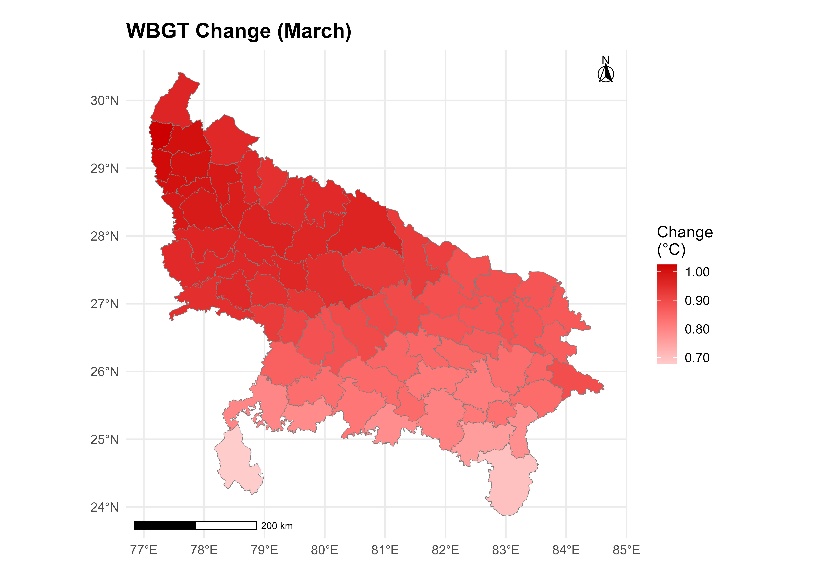 | 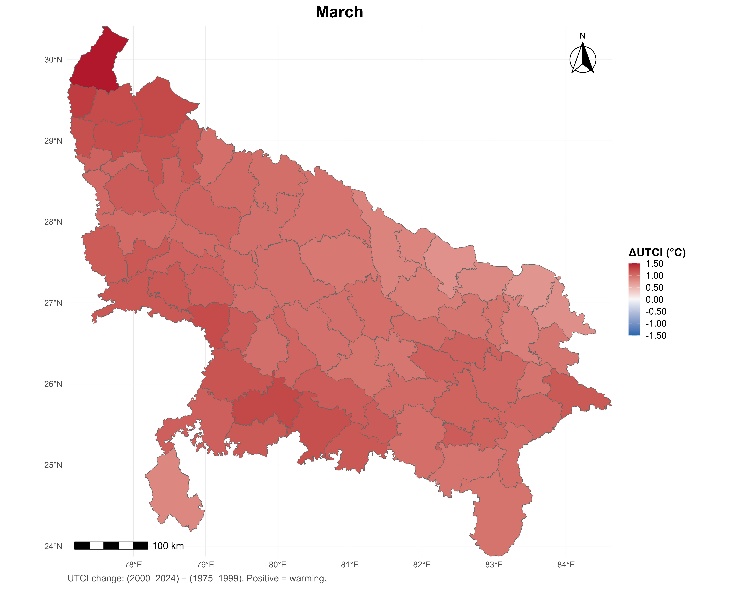 |
| e | f |
| 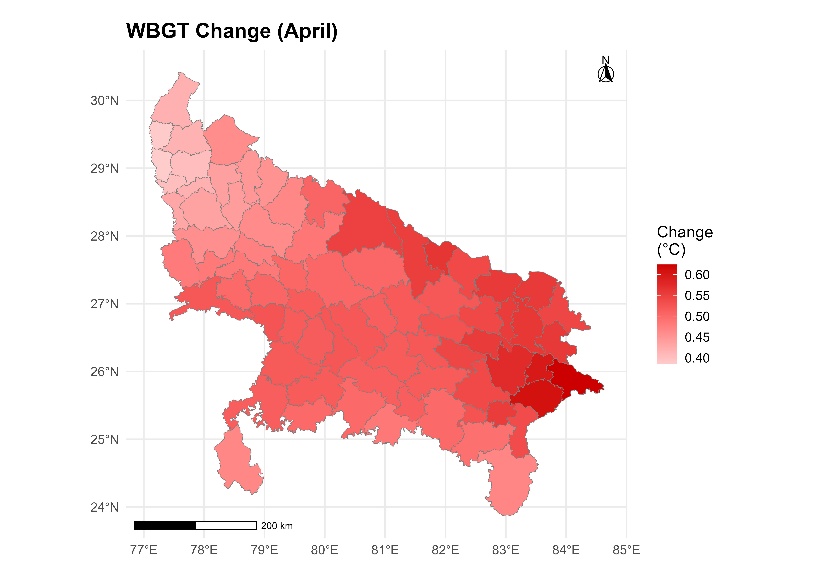 | 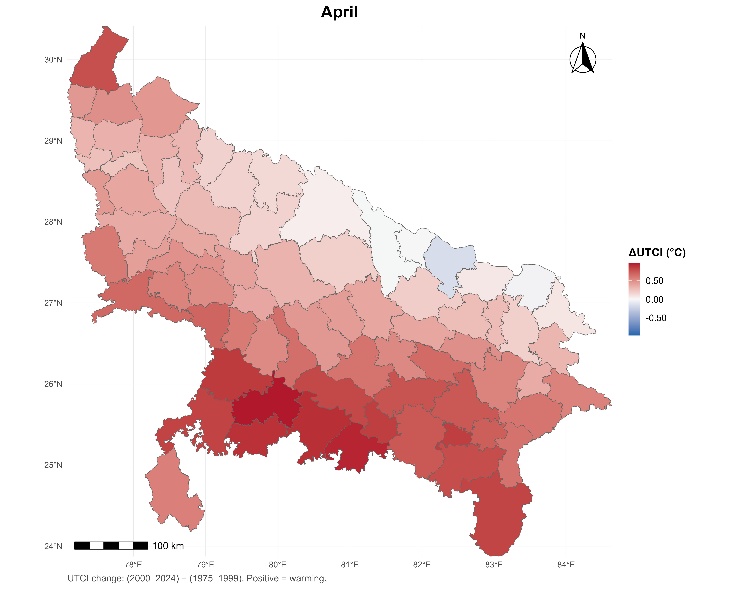 |
| g | h |
| 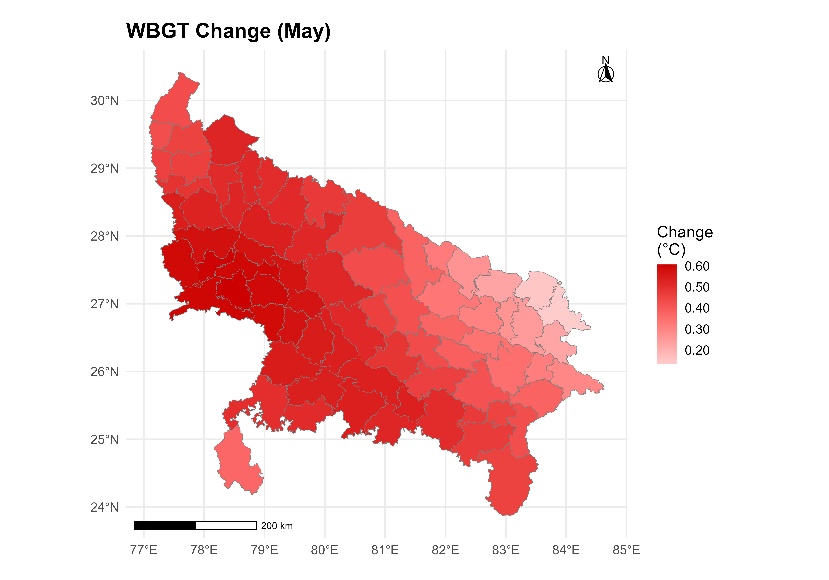 | 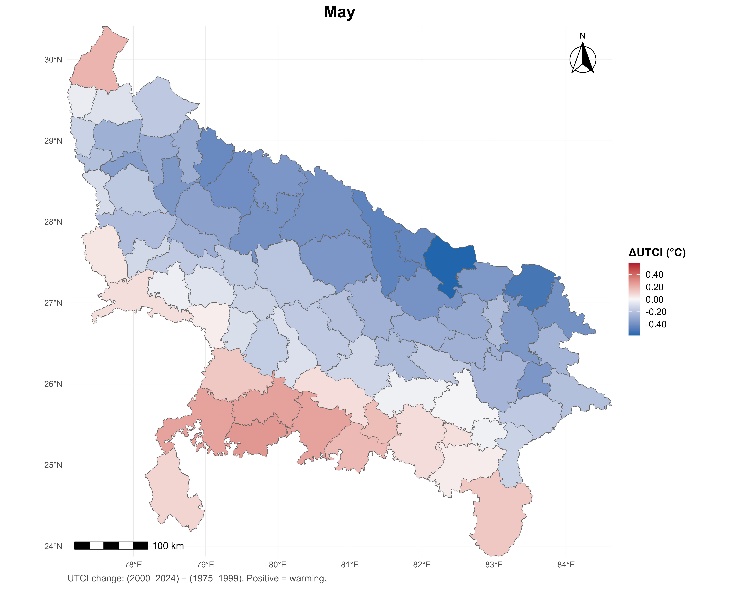 |
| i | j |
| 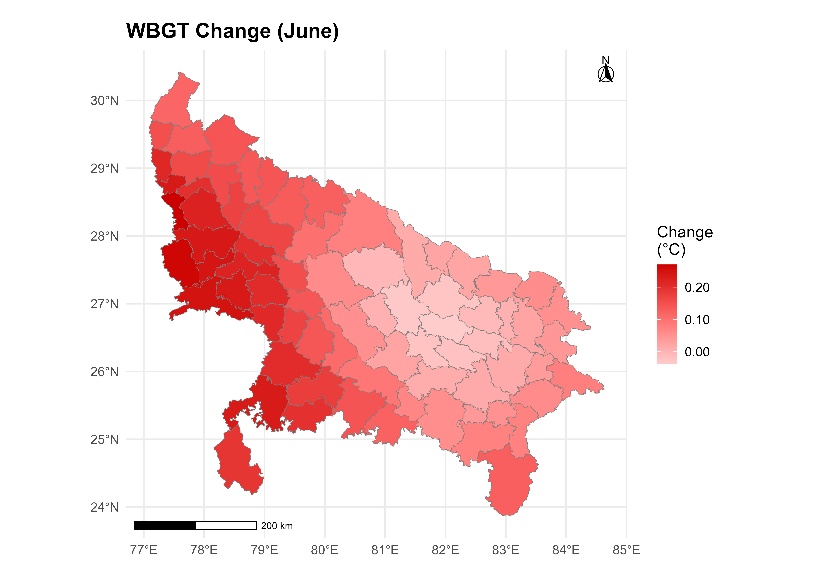 | 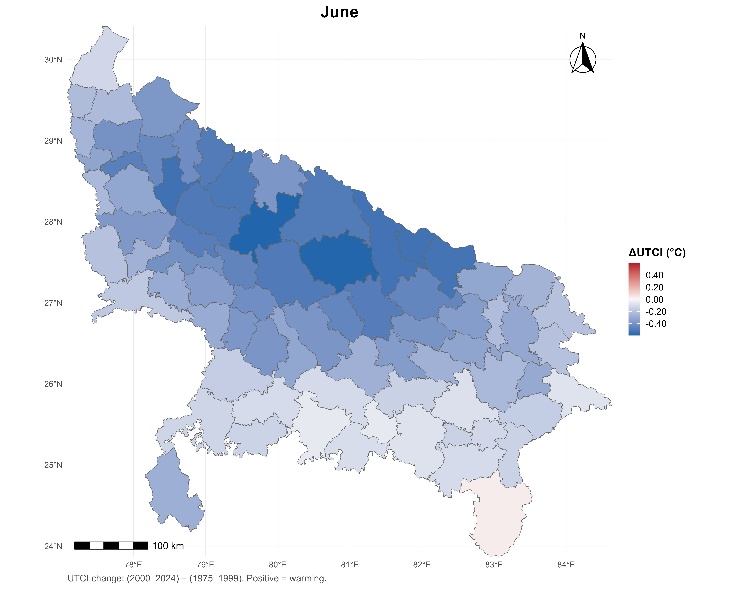 |
| k | l |
| 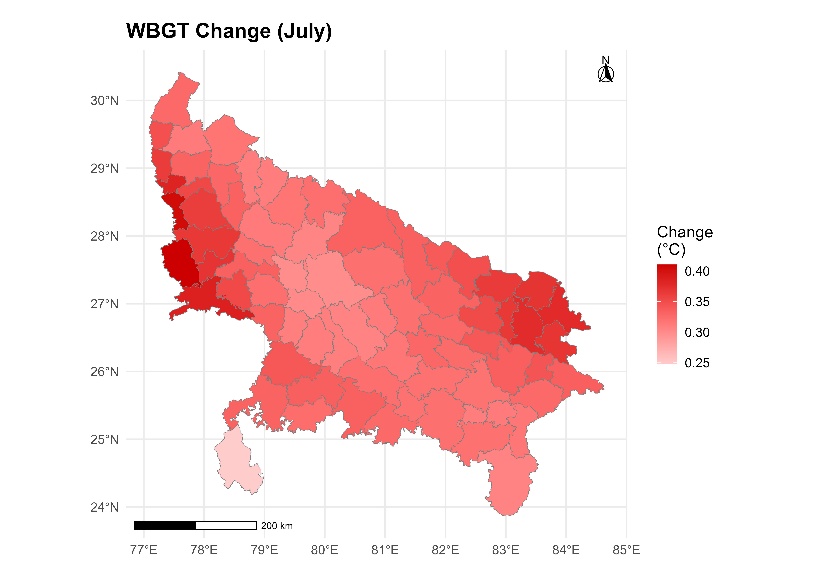 | 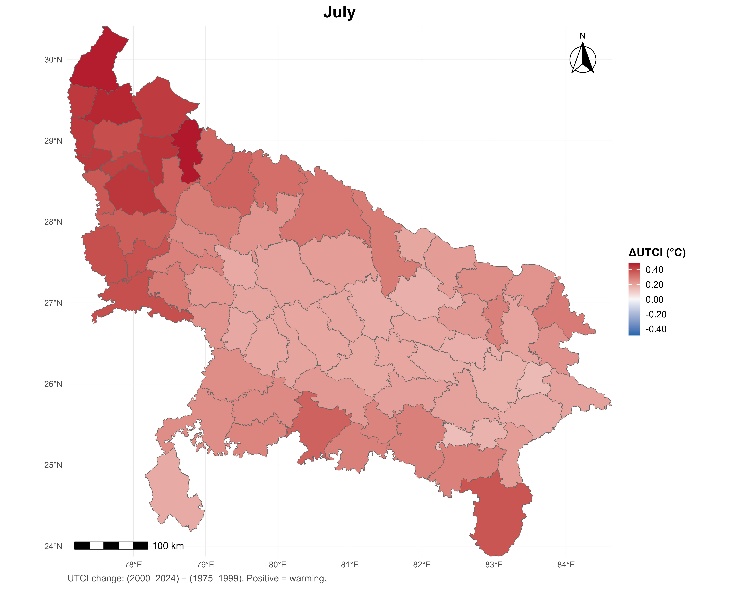 |
| m | n |
| 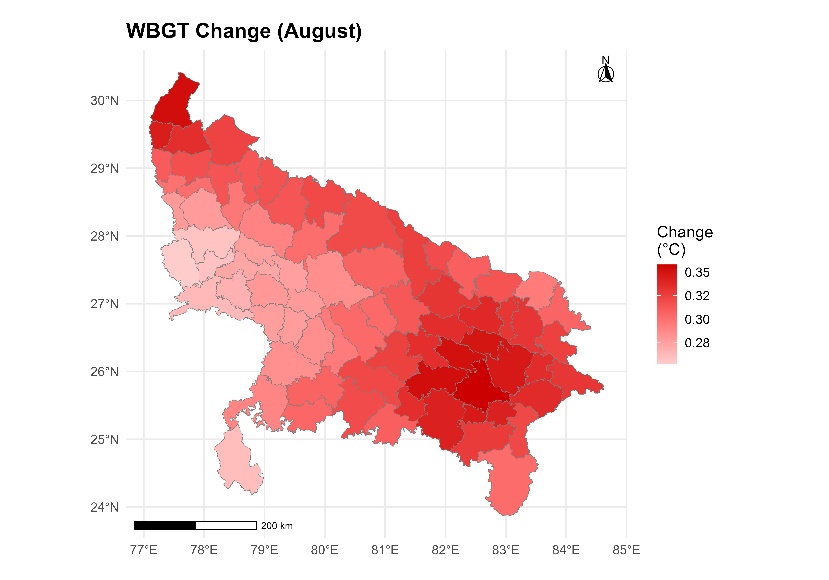 | 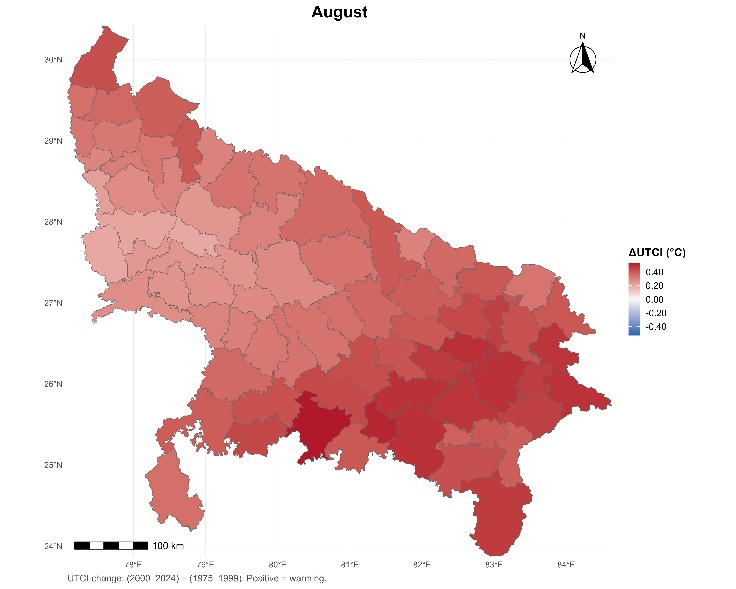 |
| o | p |
| 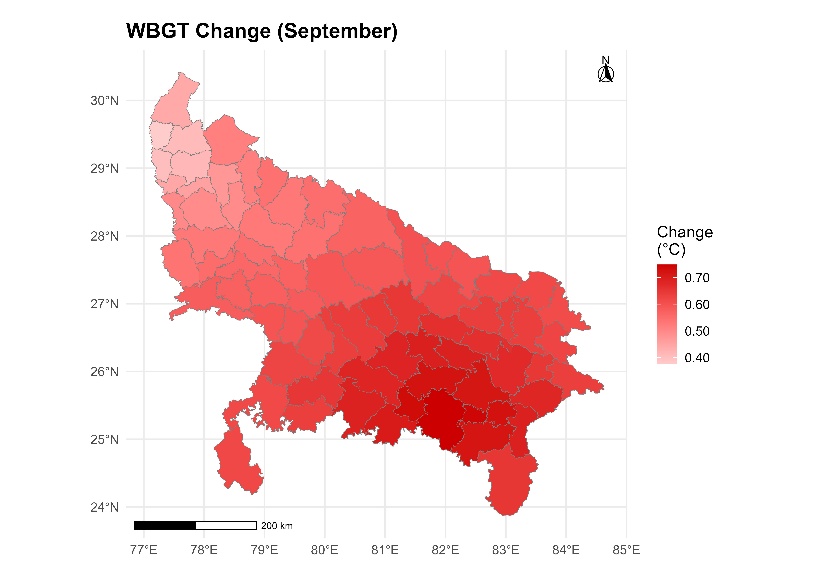 | 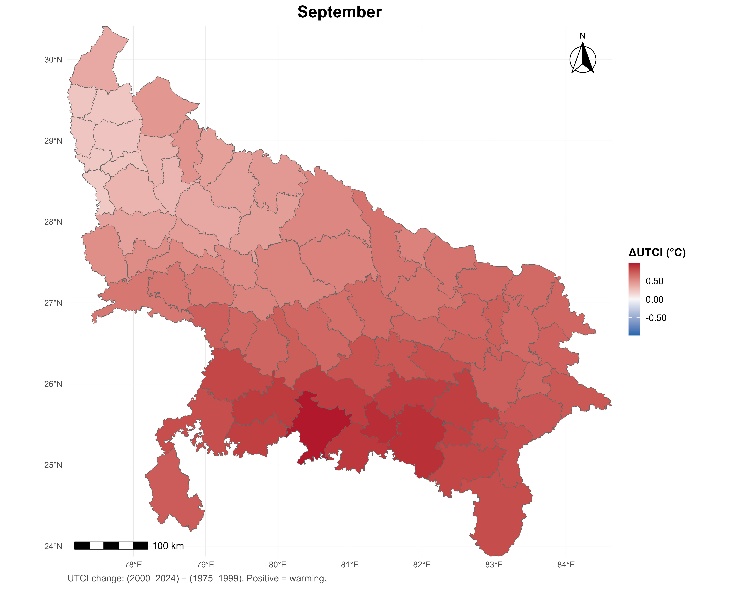 |
| q | r |
| 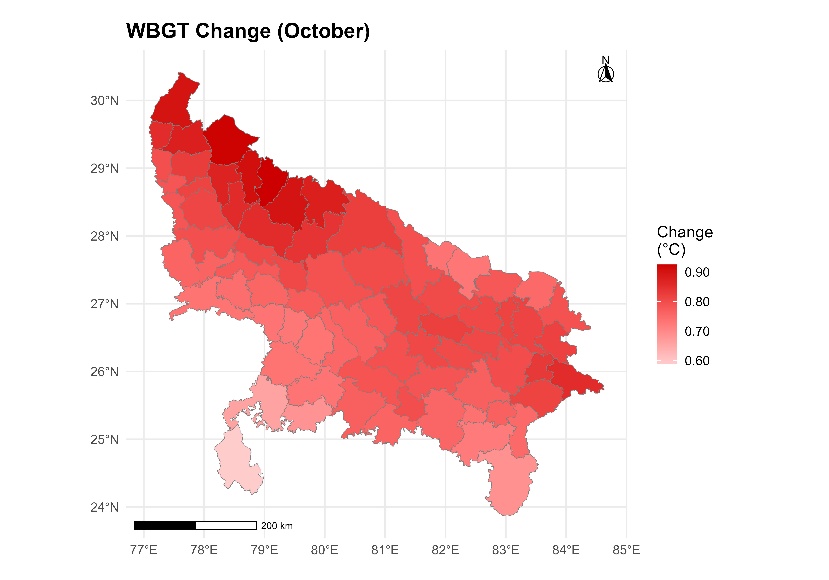 | 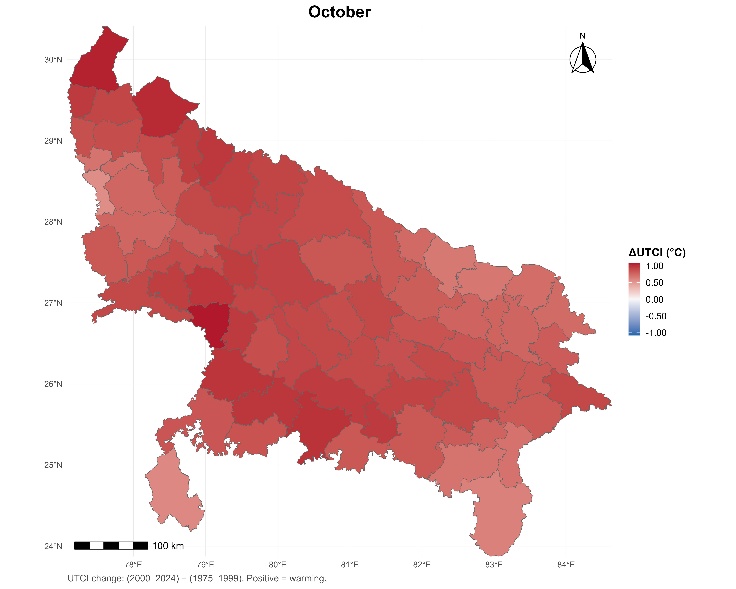 |
| s | t |
| 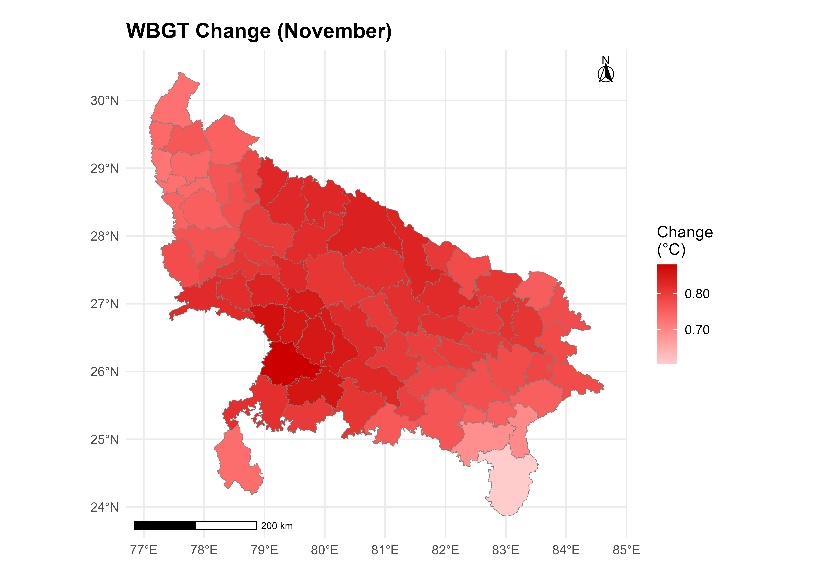 | 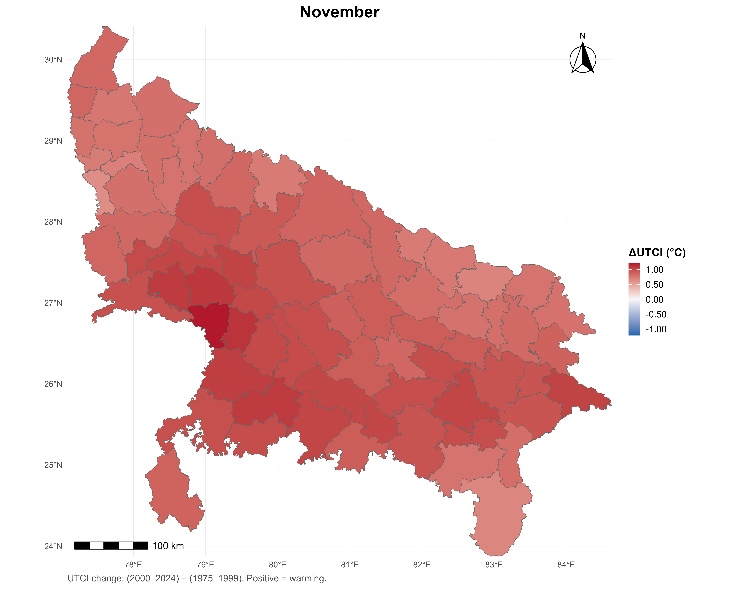 |
| u | v |
| 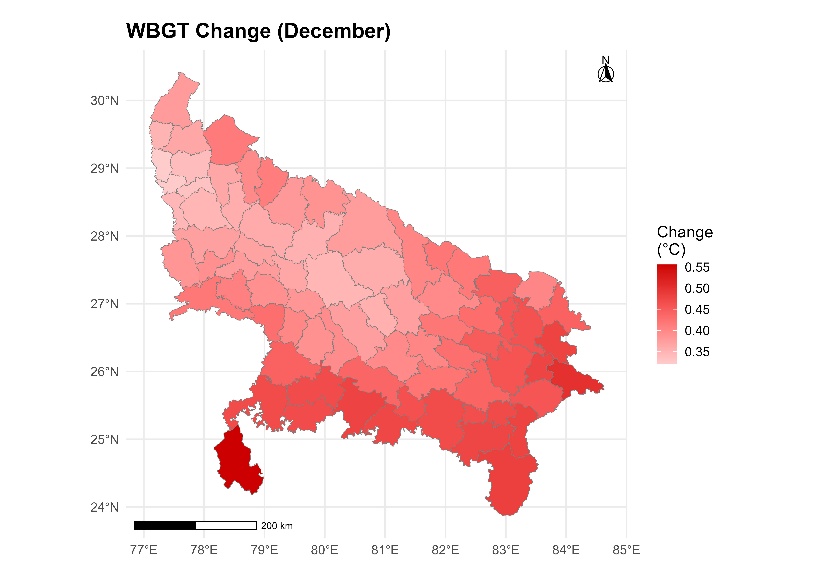 | 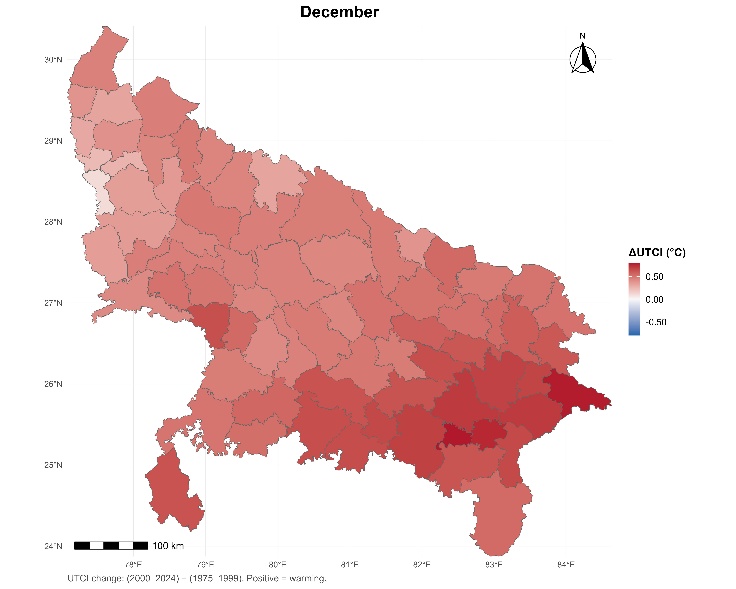 |
| w | x |

Figure S3: Spatial distribution of the mean change in thermal stress during recent cycle (C2) compared to previous cycle (C2) across the district of Uttar Pradesh during 1975-2024

| Wet Bulb Globe Temperature (WBGT) | Universal Thermal Climatic Index (UTCI) |
| --- | --- |
| 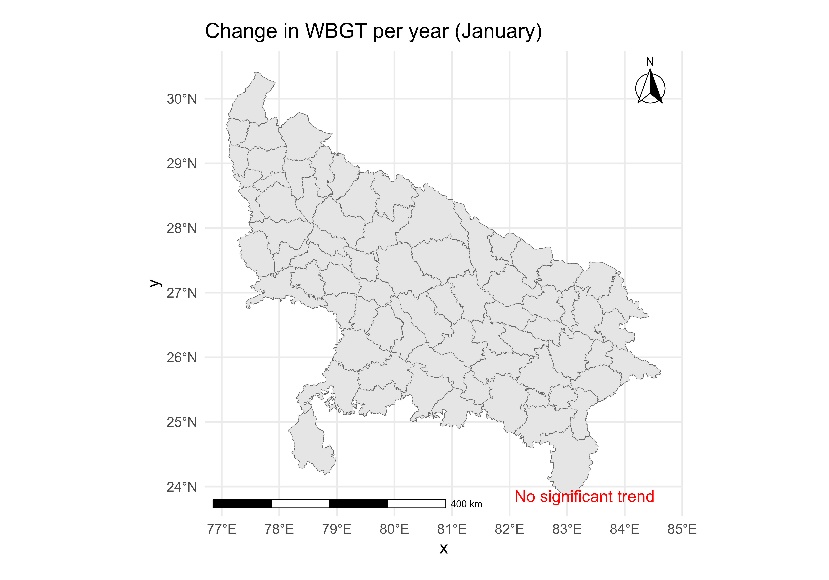 | 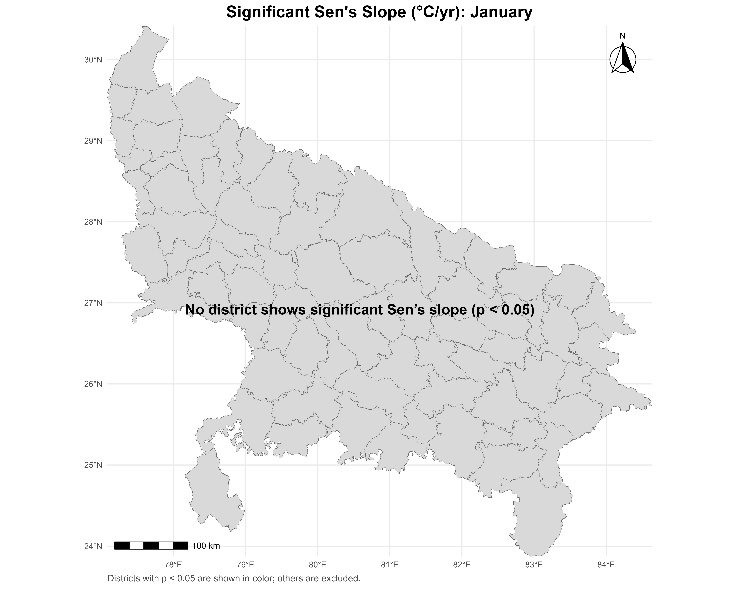 |
| a | b |
| 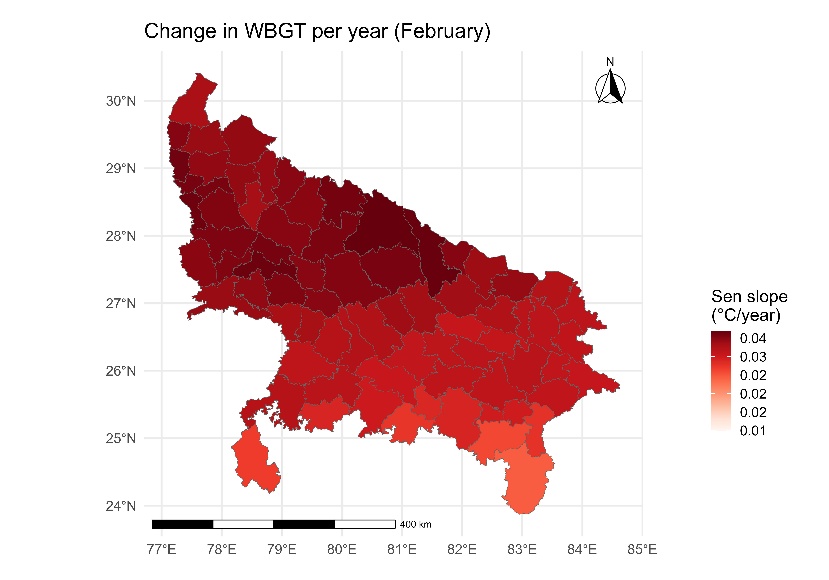 | 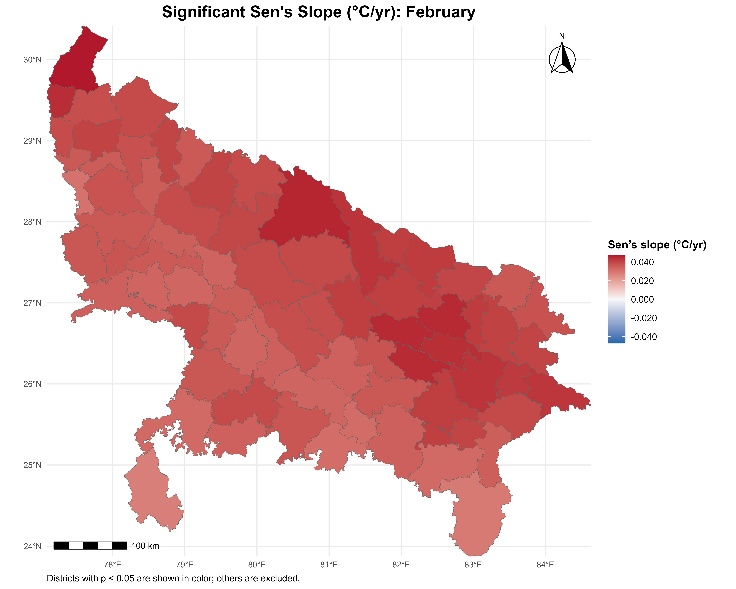 |
| c | d |
| 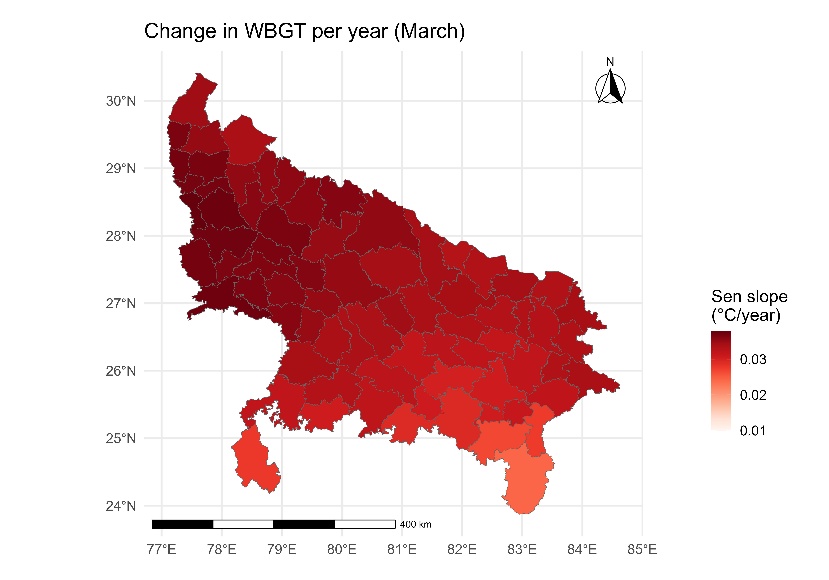 | 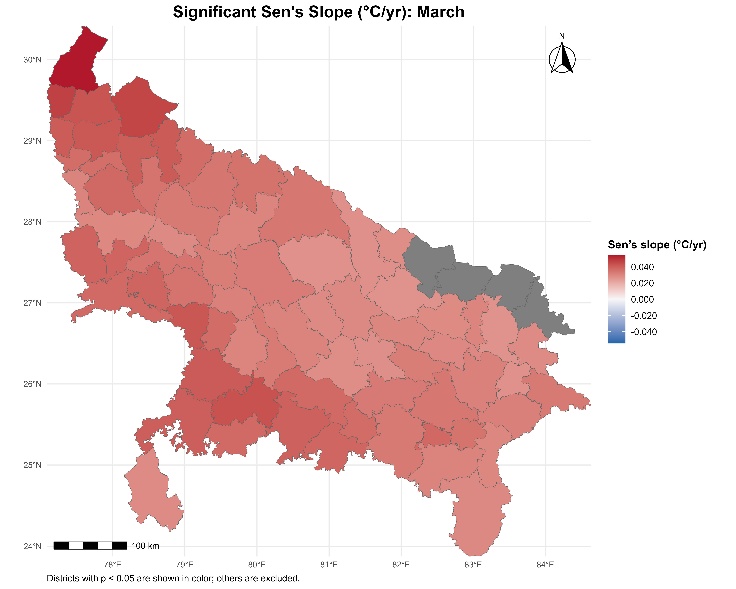 |
| e | f |
| 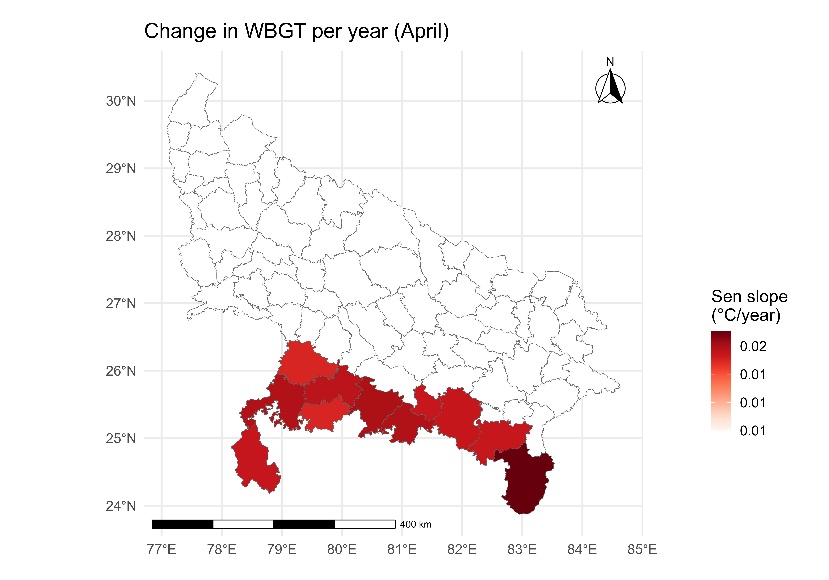 | 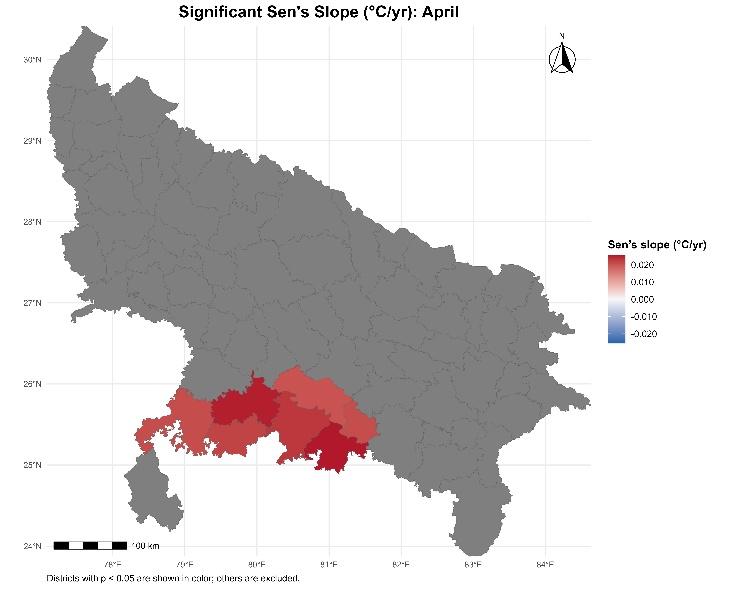 |
| g | h |
| 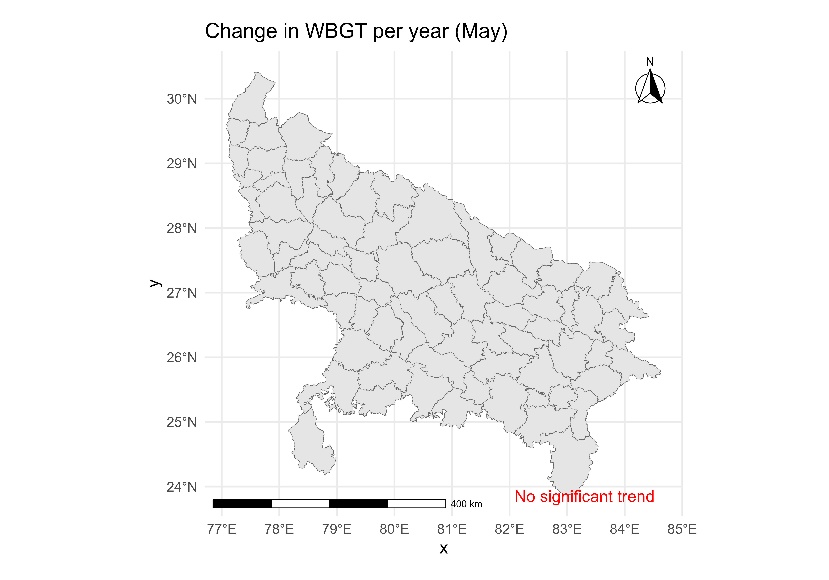 | 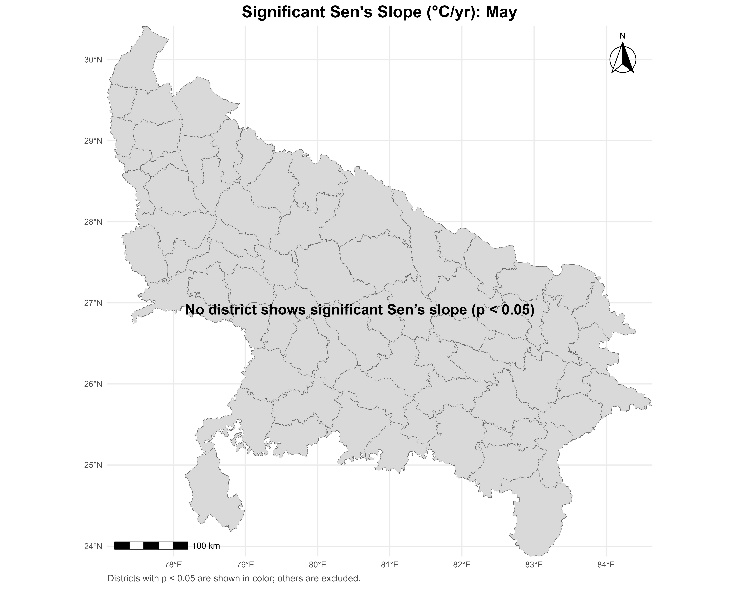 |
| i | j |
| 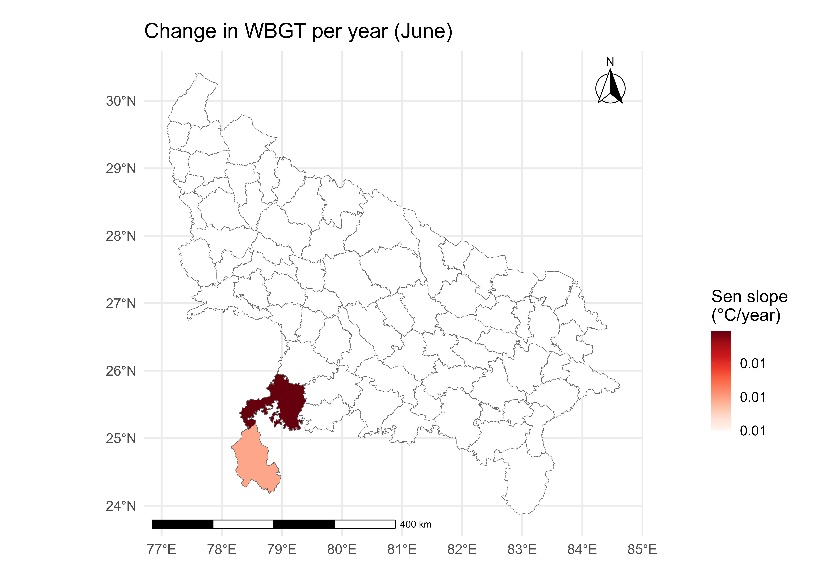 | 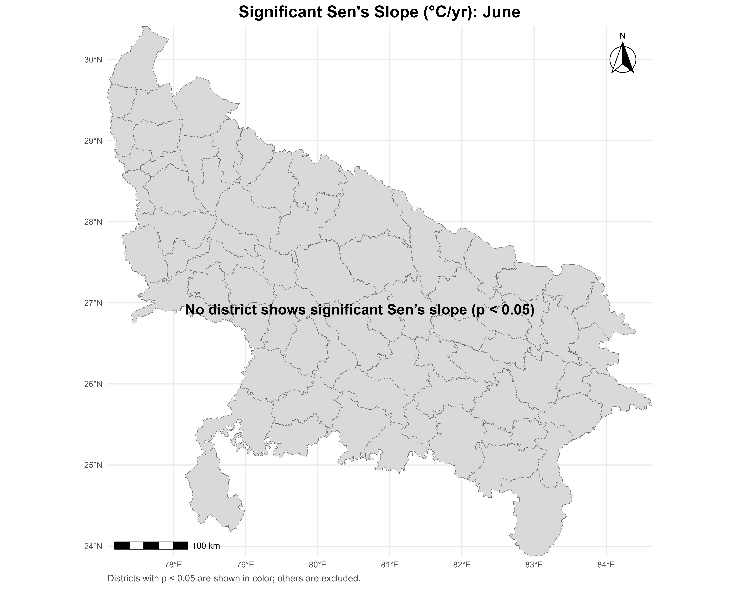 |
| k | l |
| 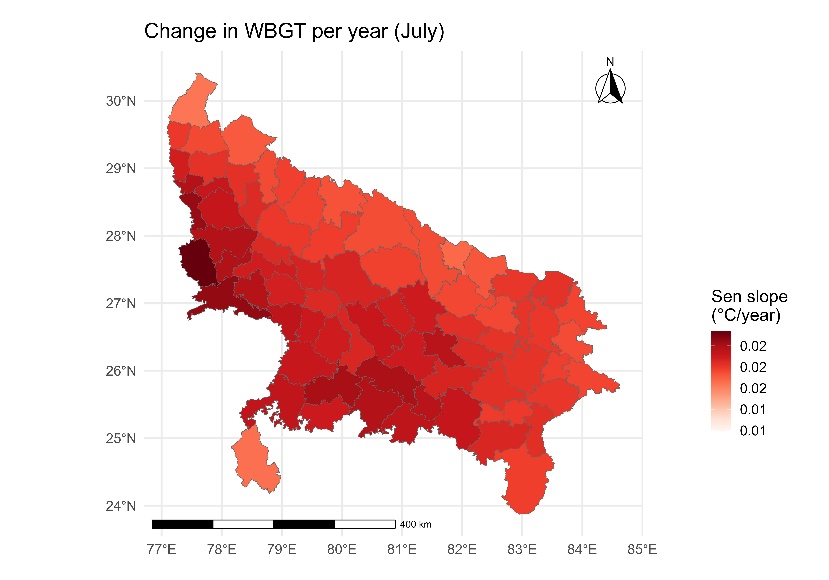 | 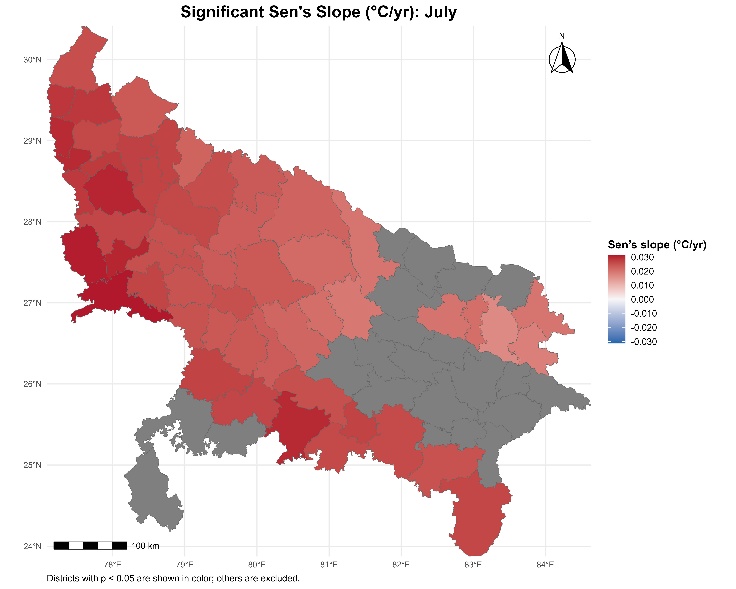 |
| m | n |
| 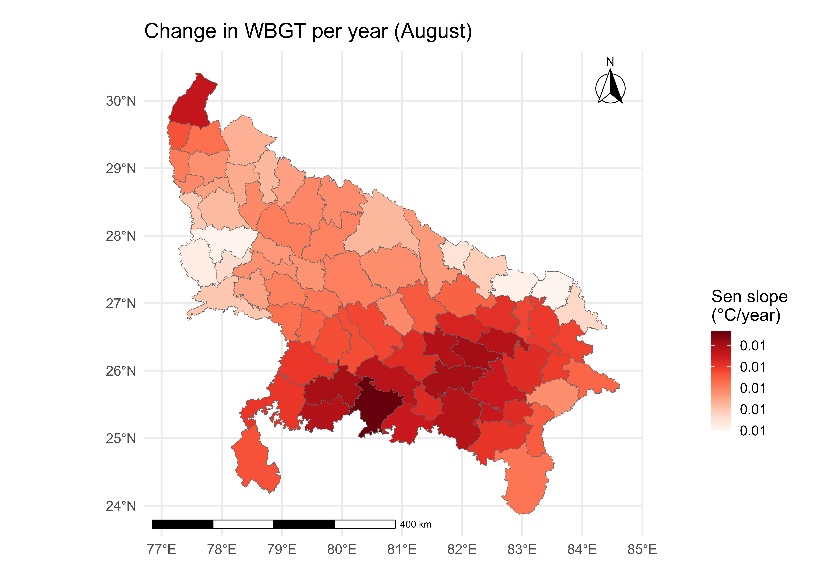 | 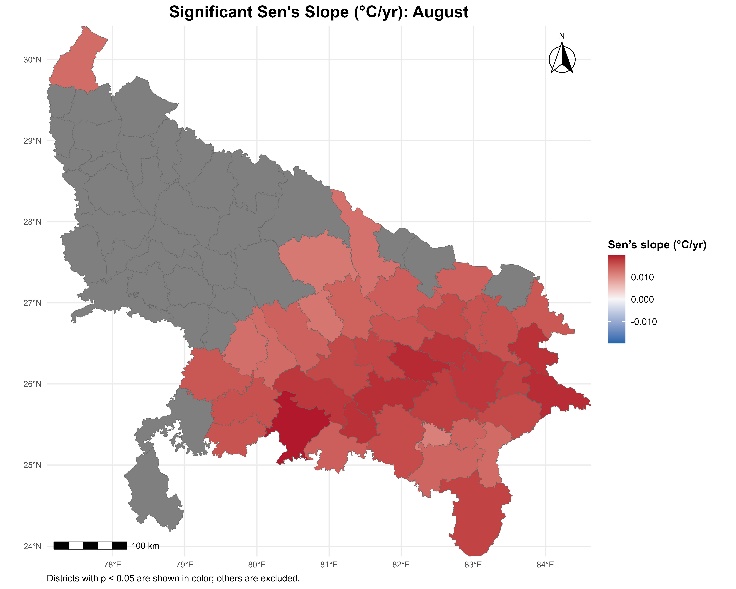 |
| o | p |
| 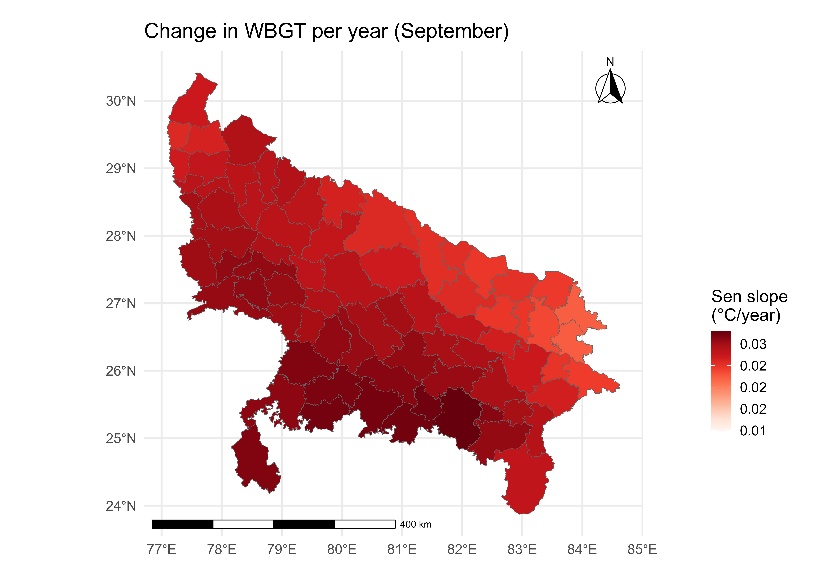 | 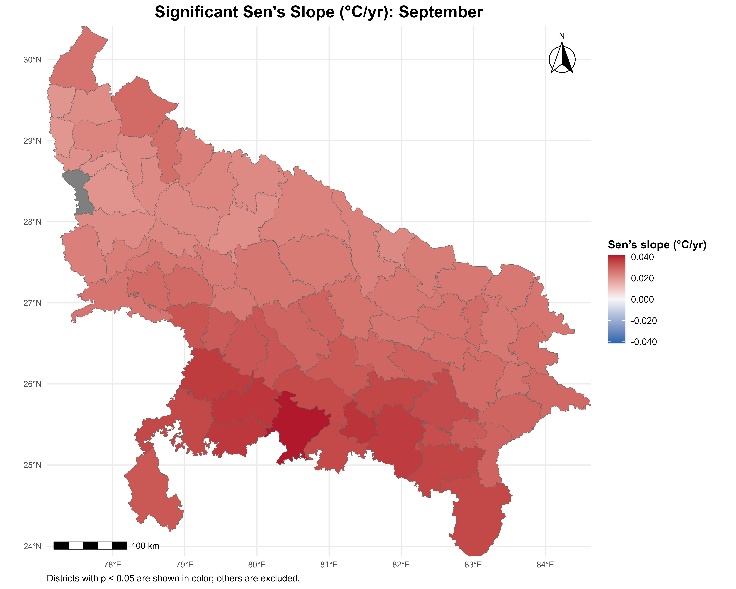 |
| q | r |
| 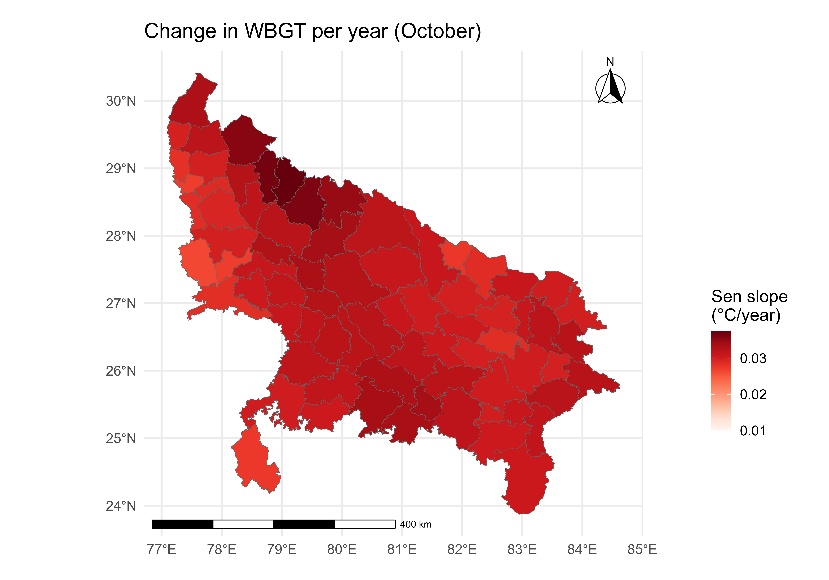 | 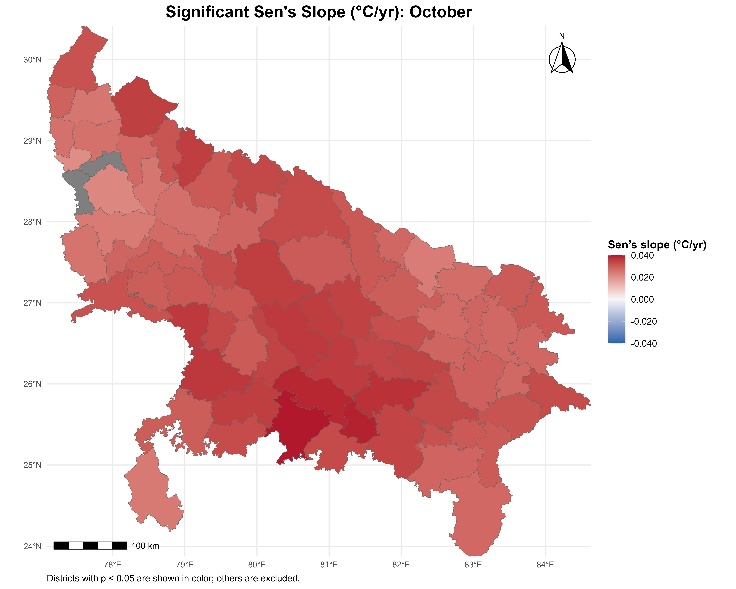 |
| s | t |
| 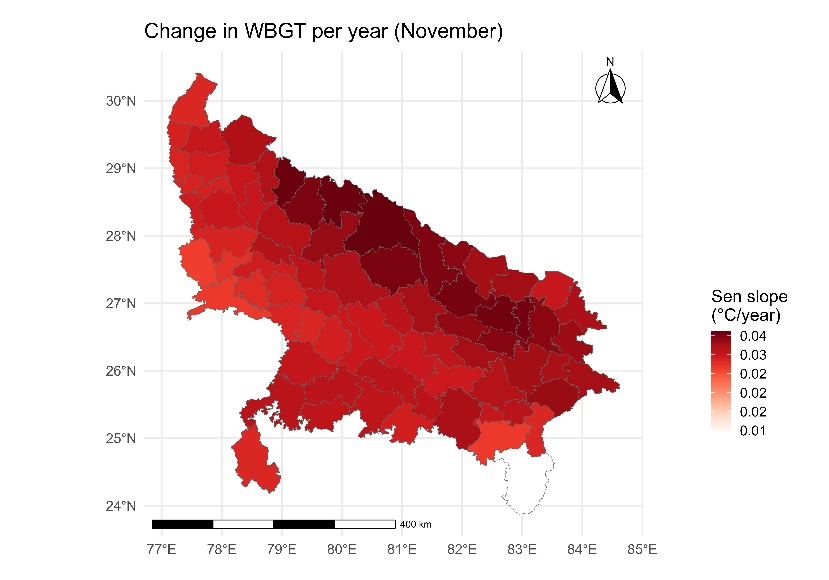 | 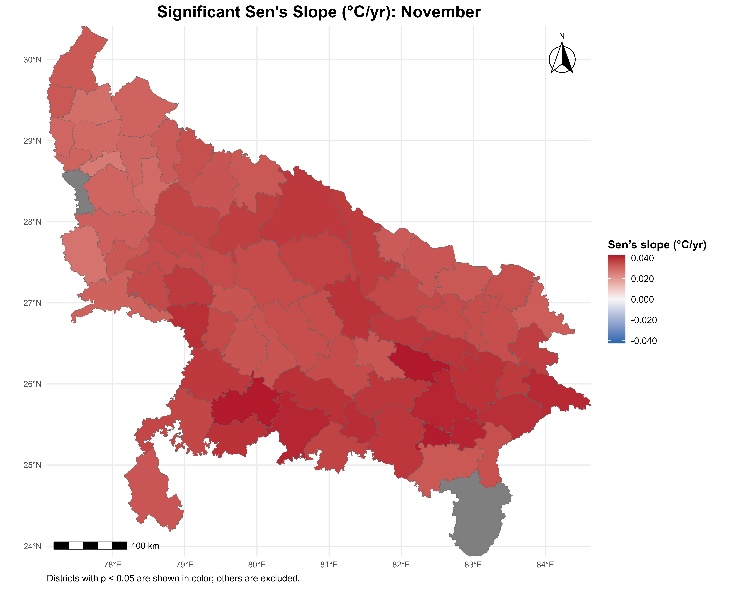 |
| u | v |
| 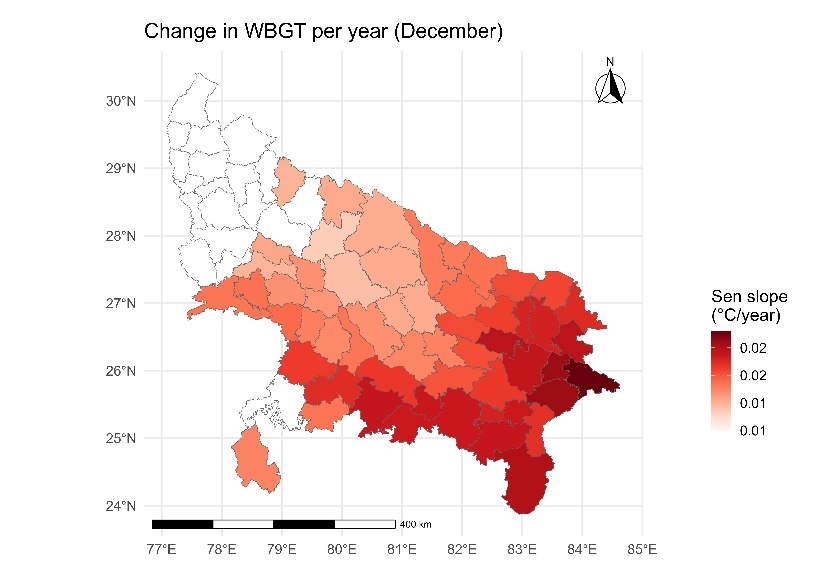 | 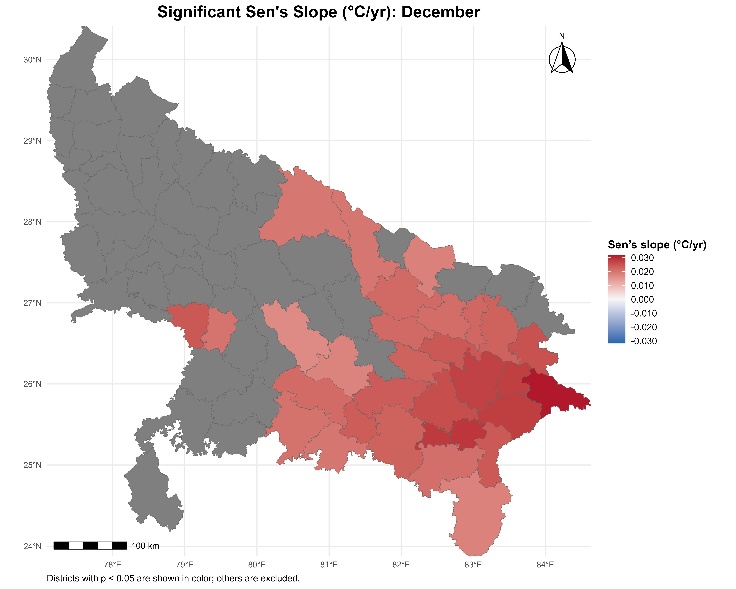 |
| w | x |

Figure S4: Trend of thermal stress across the district of Uttar Pradesh during 1975-2024 at 0.05 significance level
